# Supplementary material for: Fate-mapping post-hypoxic tumor cells reveals a ROS-resistant phenotype that promotes metastasis
Source: PubMed Central journal article supplement (PMC6813355; doi:10.1038/s41467-019-12412-1), 2019-10-24
Supplement: 41467_2019_12412_MOESM1_ESM.pdf [file 41467_2019_12412_MOESM1_ESM.pdf]

**Fate-mapping post-hypoxic tumor cells reveals a  
ROS-resistant phenotype that promotes metastasis**

Godet *et al.*

MDA-MB-231 cells

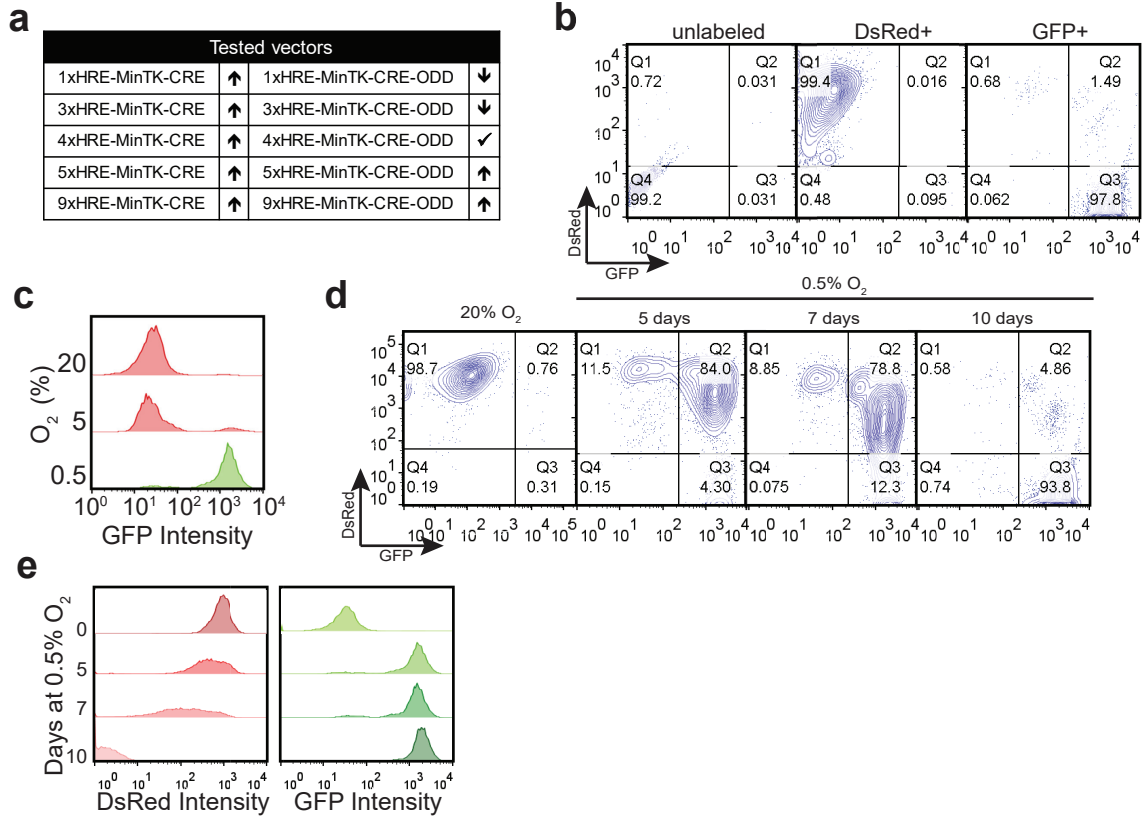

MCF7 cells

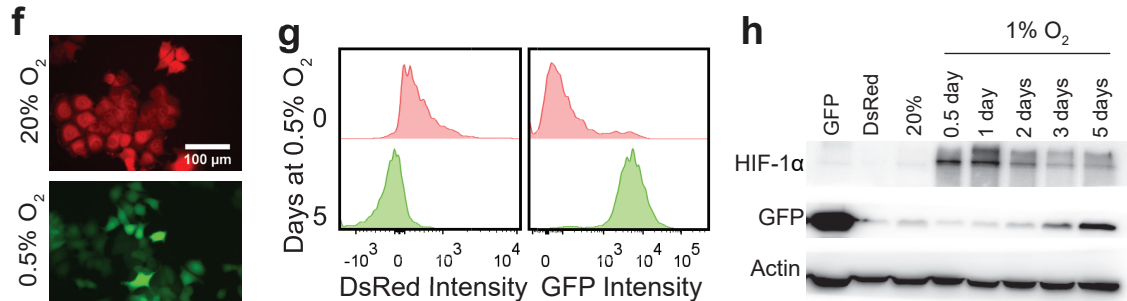

4T1 cells

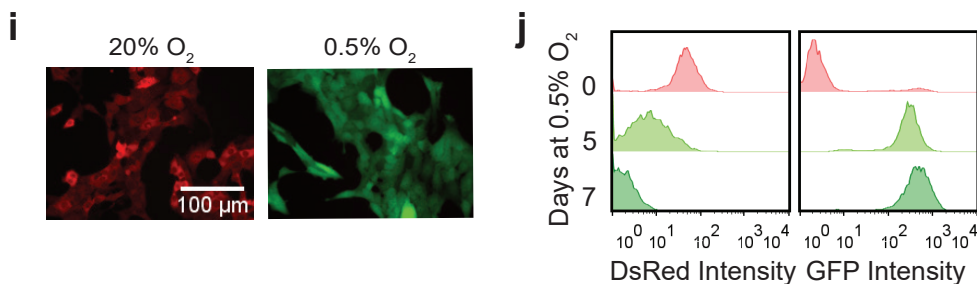

**Supplementary Figure 1. Establishing a hypoxia fate-mapping system in breast cancer cell lines.** **a**, Multiple designs for vector 2 were tested to achieve a tightly-controlled response to  $<0.5\%$   $O_2$ . Some designs resulted in no GFP expression (arrow down) even under  $0.5\%$   $O_2$ , whereas GFP was detected at  $>0.5\%$   $O_2$  in alternate designs that contained more than 5 HREs and without the addition of the ODD domain (arrow up). **b**, Contour plots displaying the gating strategy for flow cytometry analysis of DsRed and GFP expression in MDA-MB-231 hypoxia fate-mapping cells. **c**, Histogram plots of DsRed or GFP intensity as measured by flow cytometry of MDA-MB-231 fate-mapping cells exposed to 20, 5 or  $0.5\%$   $O_2$ . **d**, Contour plots of flow cytometry data for MDA-MB-231 fate-mapping cells exposed to 20% or  $0.5\%$   $O_2$  conditions for 5, 7 or 10 days. **e**, Histogram plots corresponding to contour plots in (d) of DsRed or GFP intensity as measured by flow cytometry. **f-g**, Fluorescent images (f) and representative histogram plots from flow cytometry analysis (g) of MCF7 hypoxia fate-mapping cells exposed to 20% or  $0.5\%$   $O_2$  for 7 days. **h**, Immunoblot of MCF7 hypoxia fate-mapping cells cultured under 20% or  $1\%$   $O_2$  for 0.5, 1, 2 or 3 days. DsRed or GFP only cell lines were used as controls. **i-j**, Fluorescent images (i) and representative histogram plots from flow cytometry analysis (j) of 4T1 hypoxia fate-mapping cells exposed to 20% or  $0.5\%$   $O_2$  for 7 days.

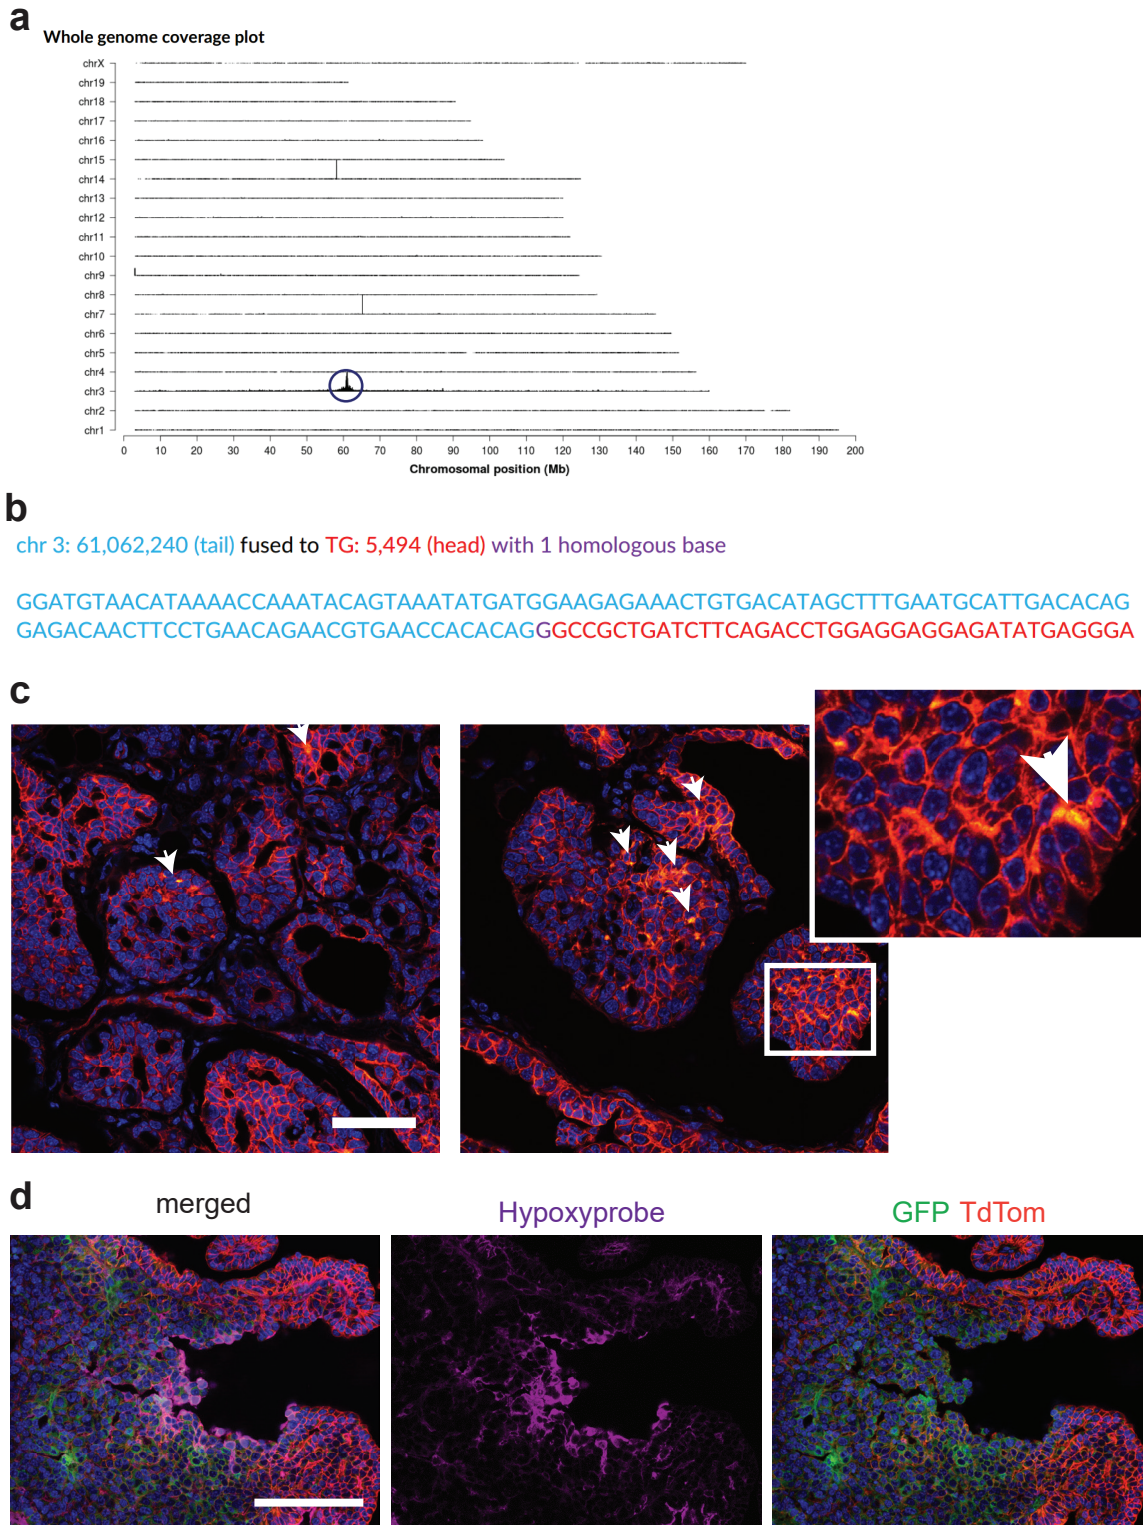

**Supplementary Figure 2. Establishing a hypoxia fate-mapping triple-transgenic mouse model.** **a**, TLA sequence coverage across the mouse genome using primer set 2 (Supplementary Table 2). The chromosome number is indicated on the y-axis and the chromosomal position on the x-axis. Similar results were obtained with primer set 1 (Supplementary Table 2). The 4xHRE-CREODD transgene integrated at chromosome 3 position 61,062,240. **b**, Nucleotide sequence of the transgene integration site. **c**, Fluorescent images of ductal carcinoma *in situ* (DCIS) during MMTV-PyMT tumor progression. Arrows point to regions of hypoxia developing in DCIS lesions. Scale bar: 50  $\mu$ m. Inset shows an enlarged view. **d**, Fluorescent image of a triple-transgenic mouse tumor that was harvested and fixed in 4% PFA. After freezing and cryo-sectioning, the tumor was stained for Hypoxyprobe<sup>TM</sup> (purple). Scale bar: 100  $\mu$ m.

MCF7 spheroid model

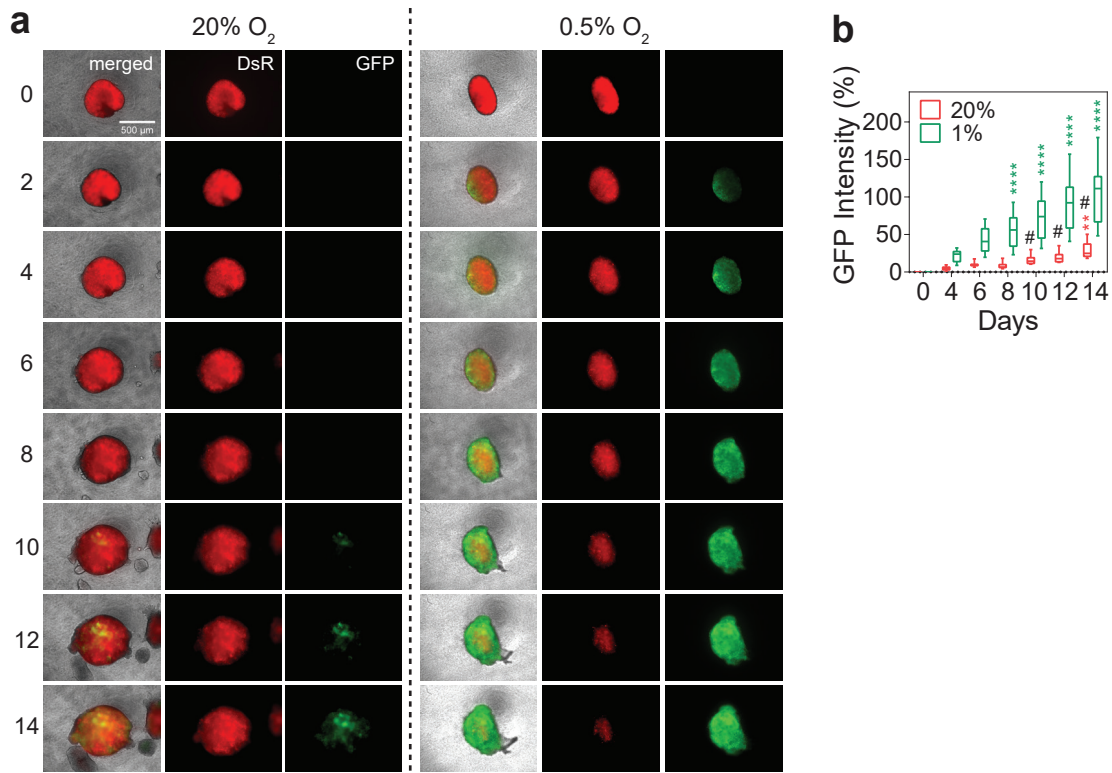

MDA-MB-231 spheroid model

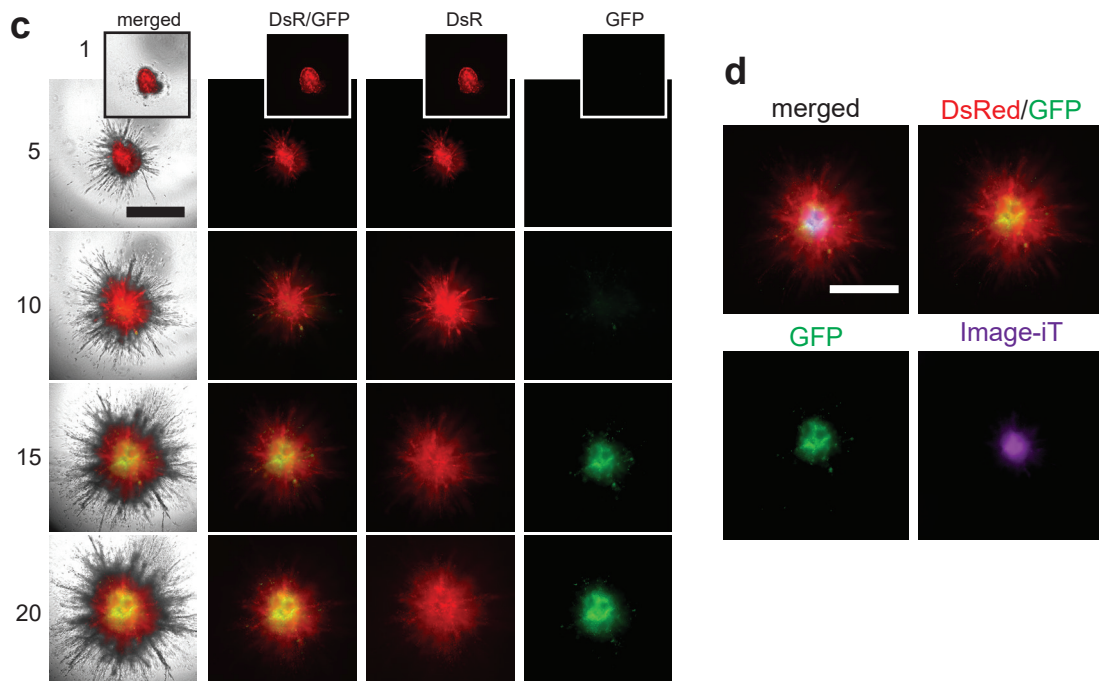

**Supplementary Figure 3. Hypoxia fate-mapping system in a spheroid model.** **a**, Spheroids consisting of MCF7 hypoxia fate-mapping cells were fully embedded in a 2 mg/ml collagen gel and cultured for 14 days under 20% or 1% O<sub>2</sub>. **b**, GFP intensity at each time point was normalized by the GFP intensity measured on day 0 (background) for spheroids cultured under 20% or 1% O<sub>2</sub> (mean ± SEM, N=2, n=16); \*\*\*\* P<0.0001 versus 20% day 4 (red) or 1% day 4 (green), and #P<0.0001 for 20% versus 1% (Two-way ANOVA with Bonferroni post-test). The box extends from the 25<sup>th</sup> to 75<sup>th</sup> percentiles, the median is marked by the vertical line inside the box, and the whiskers represent the minimum and maximum points. **c**, Fluorescent images of MDA-MB-231 spheroids embedded in 2 mg/ml collagen gels that were cultured under 20% O<sub>2</sub> and monitored over a 20-day time course. Scale bar: 1mm. **d**, Fluorescent images of an MDA-MB-231 spheroid treated with Image-iT™ hypoxia reagent for 3 h at 37°C to detect cells that are hypoxic at the time of imaging.

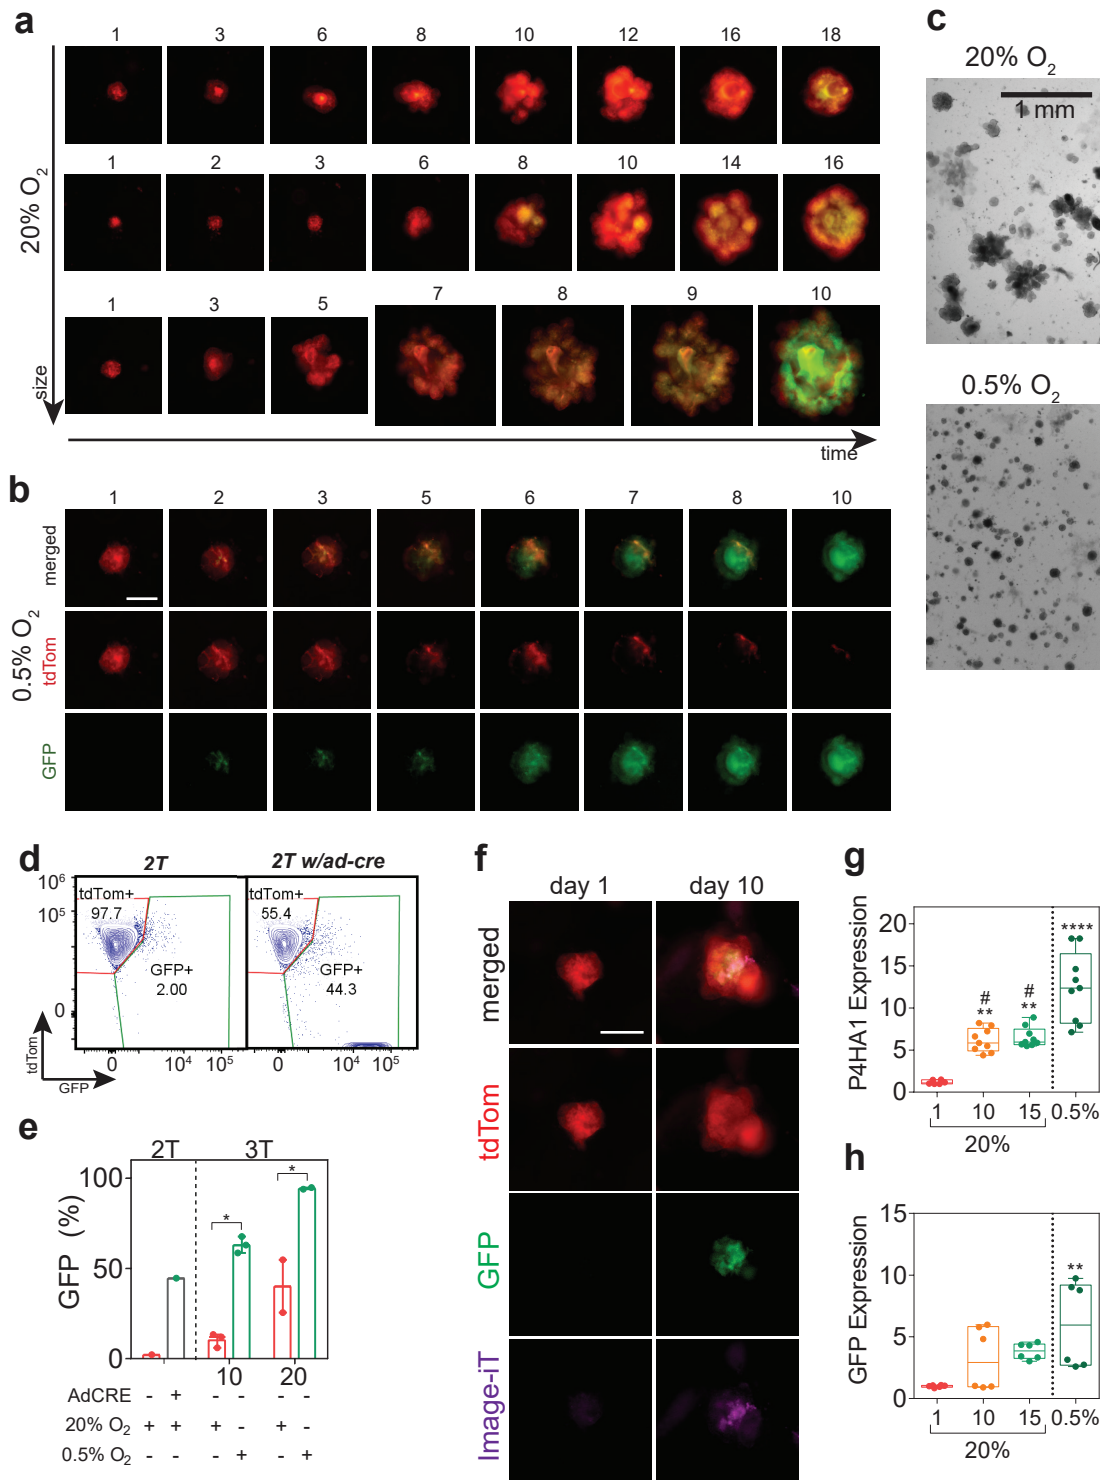

**Supplementary Figure 4. Hypoxia fate-mapping system in an organoid model.** **a**, Fluorescent images of mammary tumor organoids derived from triple-transgenic (3T) mice that were cultured under 20% O<sub>2</sub> and monitored for 10 to 18 days. Scale bar: 200 μm. **b**, Fluorescent images of 3T organoids that were embedded in Matrigel and exposed to 0.5% O<sub>2</sub> during a 10-day time period. Scale bar: 100 μm. **c**, Bright-field images of 3T organoids that were embedded in Matrigel and cultured under 20% or 0.5% O<sub>2</sub> for 10 days. **d**, Gating strategy for flow cytometry analysis of tdTom and GFP expression in organoids. Organoids derived from double-transgenic mice (2T) with the mT/mG and MMTV-PyMT transgenes were used as tdTom+/GFP control. The same organoids treated with Ad-cre were used as the GFP+ control. **e**, Percentage of GFP+ cells in organoids analyzed by flow cytometry (mean ± SEM, N=2-3, n>200); \*\*\*\* P<0.0001 versus 20% (Two-way ANOVA with Bonferroni post-test). **f**, Fluorescent images of 3T organoids that were embedded in Matrigel (3D) and cultured under 20% O<sub>2</sub> for 1 or 10 days. Organoids were incubated with Image-iT™ for 3 h at 37°C to mark hypoxic regions. Scale bar: 100 μm. **g-h**, Relative expression of P4HA1 (**g**) and GFP (**h**) mRNA levels were measured by qPCR in 3T organoids cultured for 1, 10 or 15 days under 20% or under 0.5% O<sub>2</sub> for 10 days (mean ± SEM, N=2-3, n=3); \*\*\*\* P<0.0001 versus Day 1 and # P<0.0001 versus 0.5% O<sub>2</sub> (one-way ANOVA with Bonferroni post-test). The box extends from the 25<sup>th</sup> to 75<sup>th</sup> percentiles, the median the vertical line inside the box, and the whiskers represent the minimum and maximum points. Primer sequences are available in Supplementary Table 1.

a

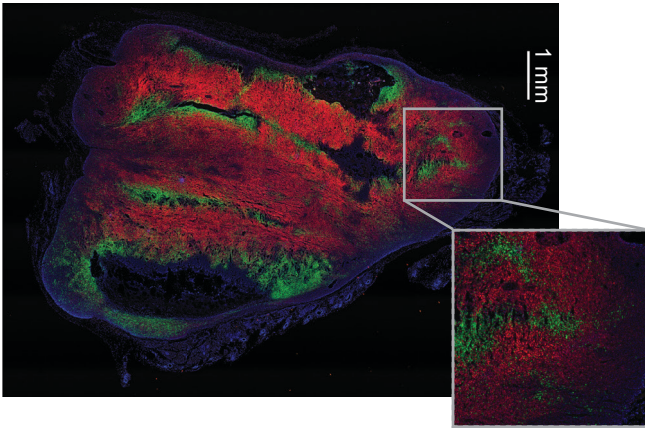

MDA-MB-231 orthotopic model

b

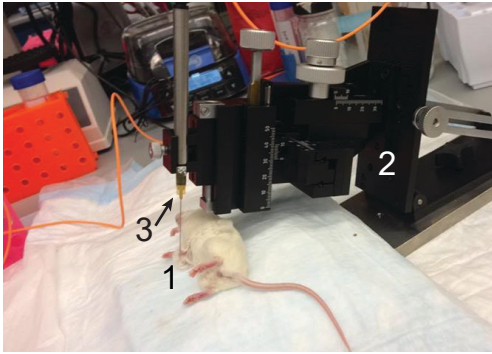

c

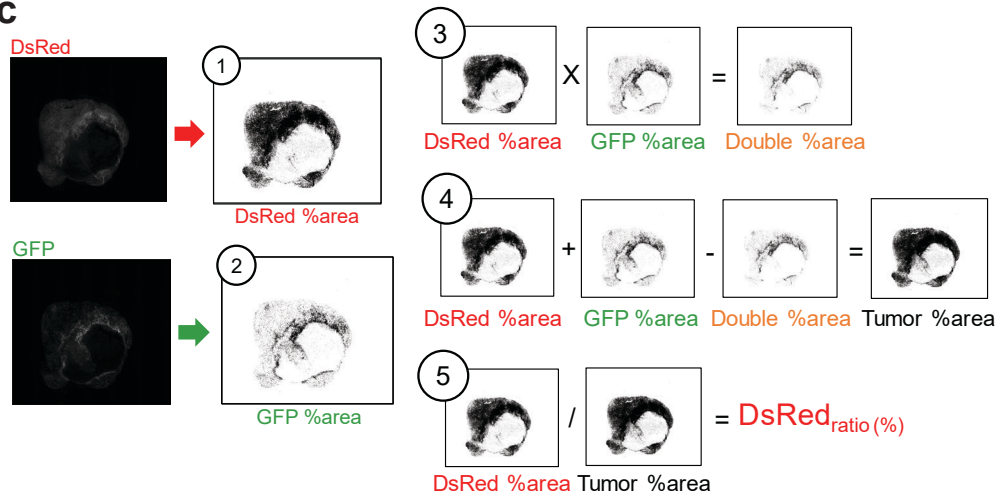

**Supplementary Figure 5. Implementing a hypoxia fate-mapping system in breast cancer models.** **a**, Fluorescent image of DsRed and GFP expression with DAPI staining of a full cross-section of an orthotopic mammary tumor in a BALB/c mouse derived from 4T1 hypoxia fate-mapping cells. Inset shows GFP+ single cells far from the hypoxic region. **b**,  $O_2$  measurements were conducted in breast tumors of living mice with a fixed-needle microsensor (1). The microsensor was positioned into the tumor using a micrometer (2) mounted to a stand and connected to a laptop.  $O_2$  concentrations were obtained starting at the midpoint of the tumor (3) and the micrometer was used to retract the sensor to capture measurements at 0.5 mm intervals until the sensor reached the tumor edge. **c**, Full MDA-MB-231 tumor cross-sections were imaged in tiles according to tumor size (up to 15x15 images) and linearly stitched. Using ImageJ, a threshold was manually applied to each fluorescent channel and converted into a binarized image (1, 2). Regions expressing both DsRed and GFP (double) were determined by the multiplication of the DsRed and GFP binarized images using the Image Calculator plugin (ImageJ) (3). The tumor area was estimated by the sum of DsRed and GFP binarized images and subtraction the double binarized area calculated using the Image Calculator plugin (4). Using individual binarized images divided by total area, we determined the ratio (%) of DsRed, GFP and double (DsRed/GFP) positive areas (5).

**a**

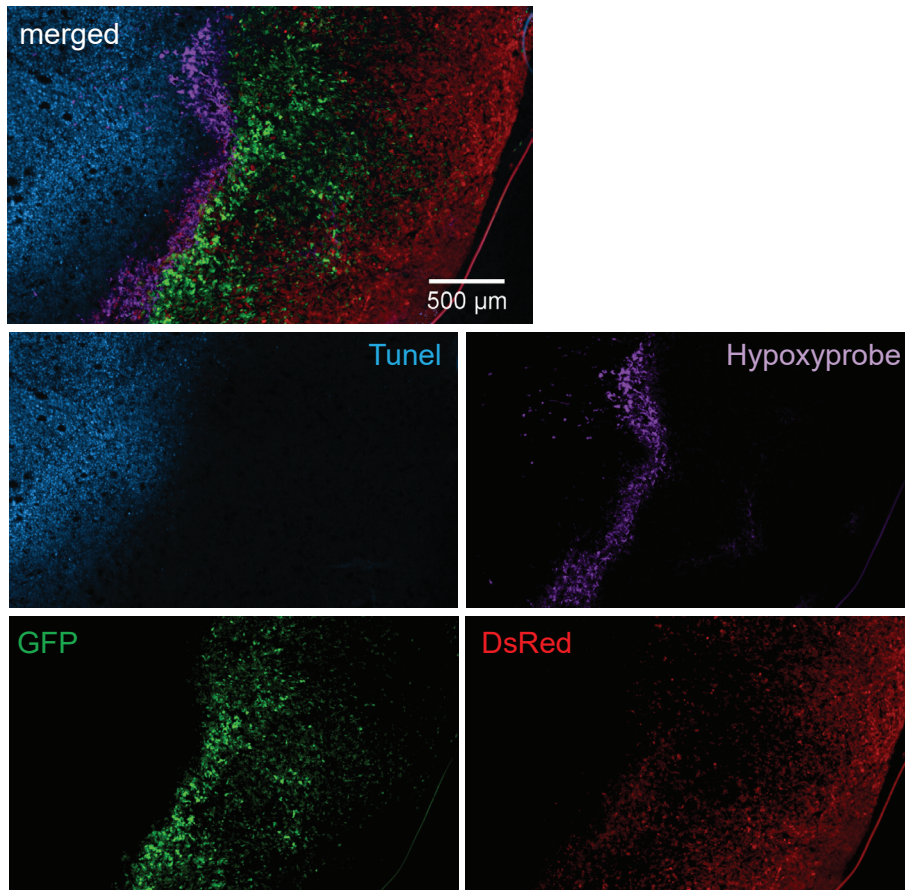

**b**

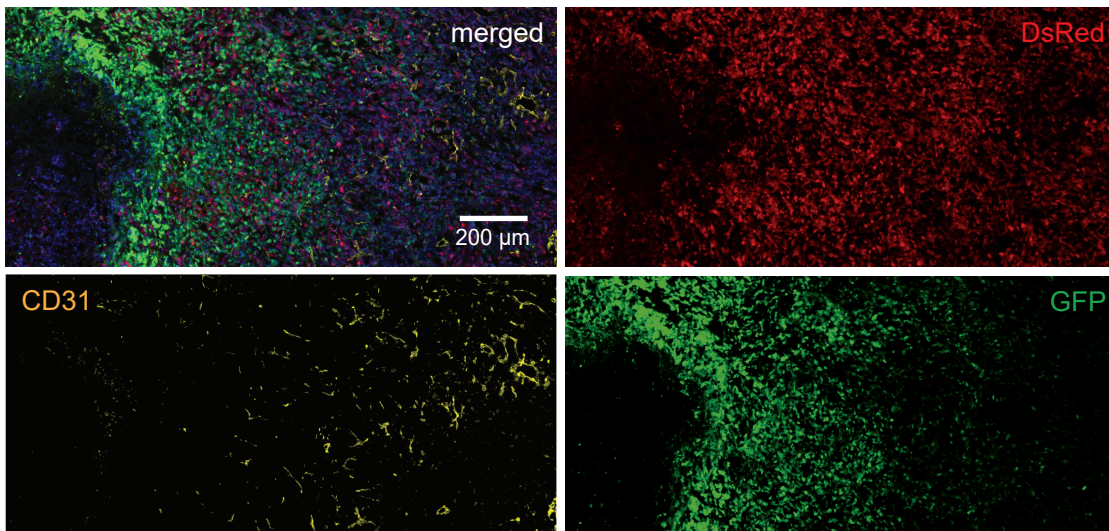

**Supplementary Figure 6. Characterizing the hypoxia fate-mapping MDA-MB-231 orthotopic model. a,** Fluorescent images of DsRed and GFP expression and TUNEL (blue) and Hypoxyprobe™ (purple) labeling. **b,** Fluorescent images of DsRed and GFP expression, and CD31 (yellow) immunofluorescent labeling to detect endothelial cells lining blood vessels.

## Intratumoral hypoxia

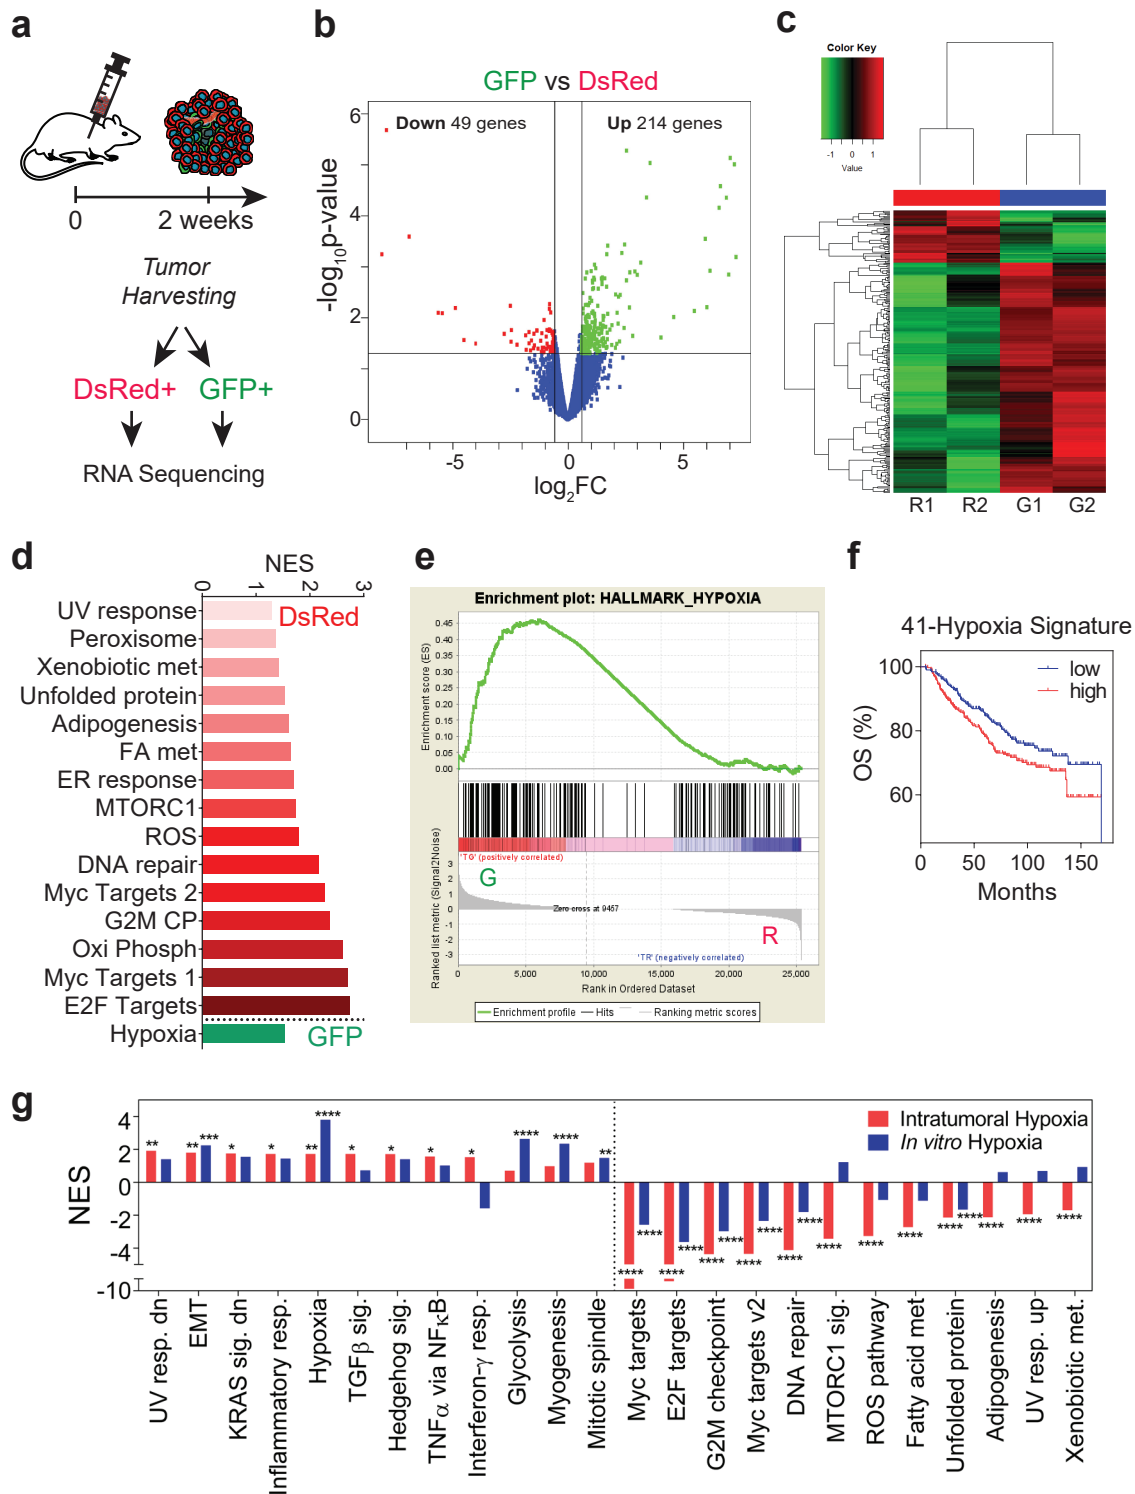

**Supplementary Figure 7. RNA sequencing of DsRed+ and GFP+ sorted tumor cells and survival analysis.** **a**, Tumors derived from hypoxia fate-mapping MDA-MB-231 cells were harvested 2 weeks after implantation, mechanically and enzymatically digested, and sorted into DsRed+/GFP- or GFP+ populations directly into Trizol (N=2) to prepare RNA. **b**, Volcano plot of gene expression from RNA sequencing analysis comparing GFP+ versus DsRed+ tumor cells. Red – down-regulated genes; Green – up-regulated genes ( $-1.5 \geq FC \geq 1.5$ ) and  $p\text{-value} < 0.05$ . **c**, Heatmap of gene expression from RNA sequencing analysis which compares RNA expression in GFP+ (G1 and G2) to DsRed+ tumor cells (R1 and R2). **d**, Normalized enrichment scores (nominal  $p\text{-value} \leq 0.05$ ) derived from (Gene Set Enrichment Analysis) GSEA against Hallmark gene sets of DsRed+ and GFP+ cancer cells purified from resected tumors. **e**, GSEA enrichment analysis for hallmark Hypoxia upregulated in class GFP+ (G). Normalized Enrichment score (NES) = 1.54. Nominal  $p\text{-value} = 0.0012$ . **f**, Kaplan–Meier analysis of overall survival (OS) of breast cancer patients stratified by high or low expression of the 41-gene signature derived from the overlap of intratumoral and *in vitro* hypoxia, according to the median expression of the gene set. **g**, Normalized enrichment scores (\*\*\*\* nominal  $P < 0.0001$ ) derived from pre-ranked (Gene Set Enrichment Analysis) GSEA against Hallmark gene sets. ‘Intratumoral’ and ‘*In vitro*’ hypoxia matched gene lists were ranked according to the hypoxic induction (fold-change) in each condition.



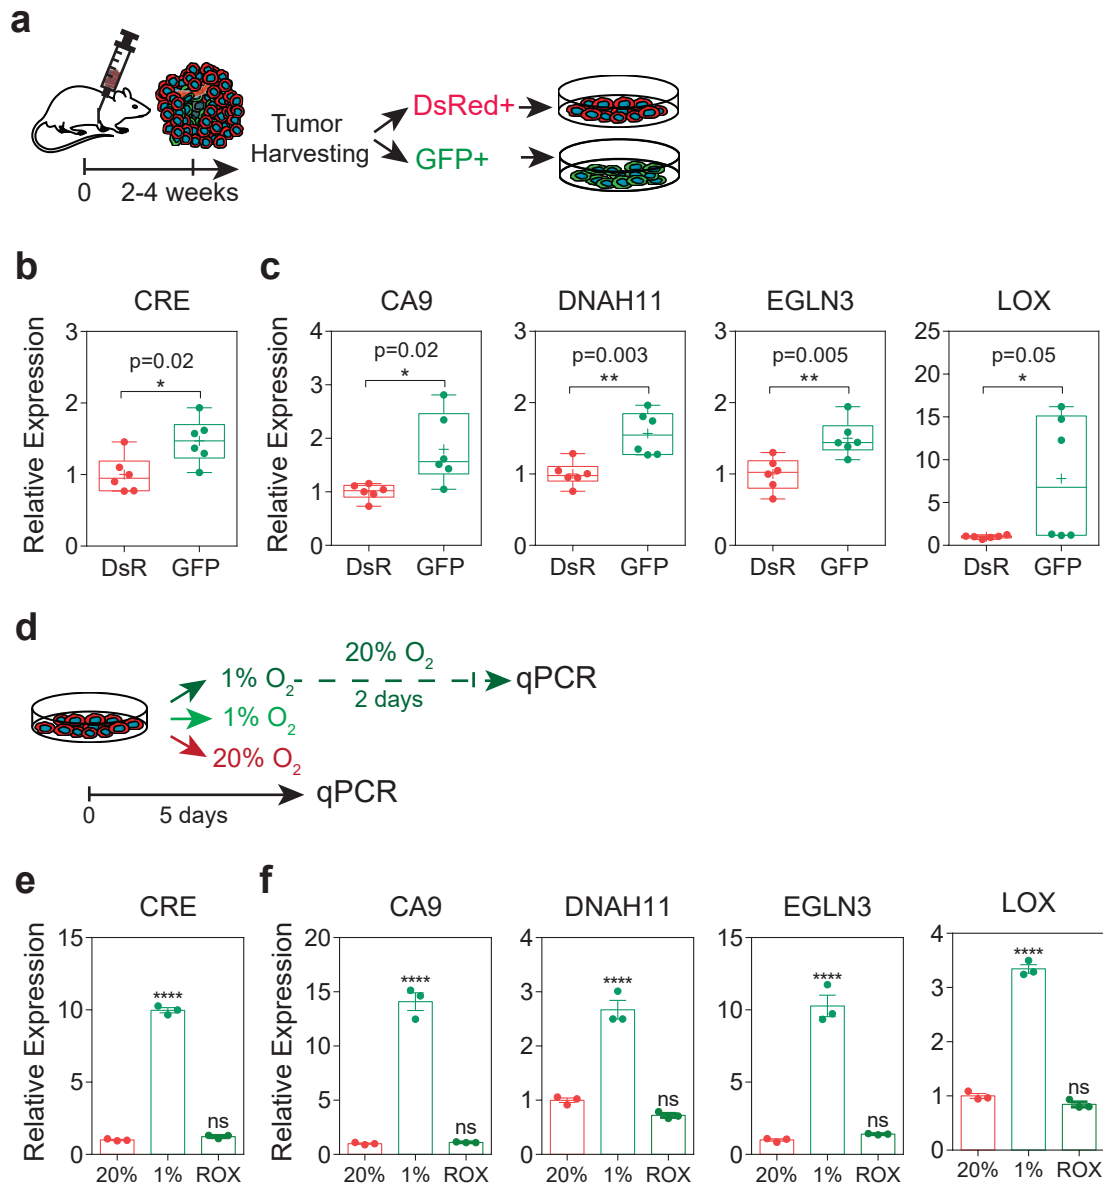

**Supplementary Figure 8. Comparing reoxygenation effects in gene expression after *in vivo* or *in vitro* hypoxia.** **a**, Cells were recovered from hypoxia fate-mapping MDA-MB-231 tumors by FAC-sorting directly into cell culture media (DsRed+/GFP- or GFP+). Cells were kept in culture for ~20 doublings (5-6 passages) and gene expression was tested using qPCR. **b**, Relative expression of CRE mRNA levels measured by qPCR in fate-mapping tumor-derived MDA-MB-231 cells (mean  $\pm$  SEM, N=2, n=3); \*\*\*\* P<0.0001 GFP versus DsRed (two-tailed t-test). **c**, Relative expression of mRNA levels of selected genes present in the Venn diagram overlap of *in vivo* and *in vitro* hypoxia. CA9 (Carbonic Anhydrase 9), DNAH11 (Dynein Axonemal Heavy Chain 11), EGLN3 (Egl-9 Family Hypoxia Inducible Factor 3) and LOX (Lysyl Oxidase) were measured by qPCR in fate-mapping tumor-derived MDA-MB-231 cells (DsRed or GFP) (mean  $\pm$  SEM, N=2, n=3); \*\*\*\* P<0.0001 GFP versus DsRed (two-tailed t-test). The box extends from the 25<sup>th</sup> to 75<sup>th</sup> percentiles, the median is marked by the vertical line inside the box, and the whiskers represent the minimum and maximum points. **d**, MDA-MB-231 cells were exposed to 1% O<sub>2</sub> for 5 days and reoxygenated (ROX) at 20% O<sub>2</sub> for 48 hours. **e**, Relative expression of CRE mRNA levels measured by qPCR in MDA-MB-231 cells (mean  $\pm$  SEM, n=3); \*\*\*\* P<0.0001 versus 20% (one-way ANOVA with Bonferroni post-test). **f**, Relative expression of mRNA levels of selected genes present in the Venn diagram overlap of *in vivo* and *in vitro* hypoxia. CA9, DNAH11, EGLN3 and LOX were measured by qPCR in MDA-MB-231 cells (mean  $\pm$  SEM, n=3); \*\*\*\* P<0.0001 versus 20% (one-way ANOVA with Bonferroni post-test). Primer sequences are available in Supplementary Table 1.

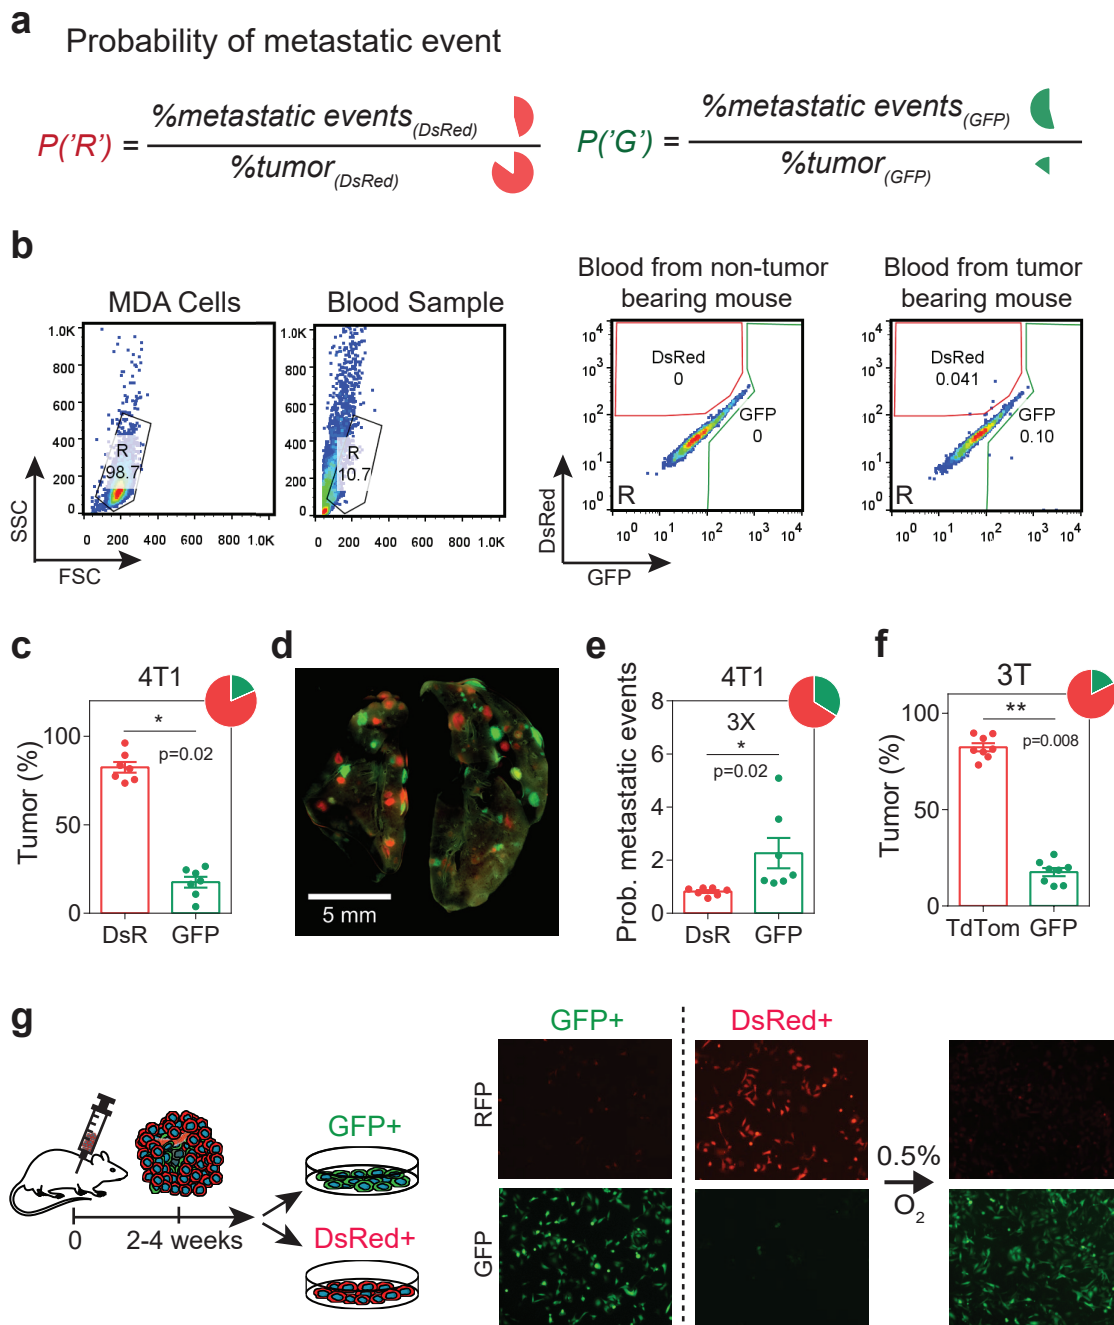

**Supplementary Figure 9. Post-hypoxic cells have enhanced metastatic potential.** **a**, The probability of having a GFP+ metastatic event compared to a DsRed+ event was calculated by dividing the ratio of DsRed+ or GFP+ cells at the metastatic site by the ratio of DsRed+ or GFP+ cells present in the matched tumor and then normalizing to DsRed+. **b**, Dot plots displaying the gating strategy for flow cytometry analysis of DsRed and GFP expression in MDA-MB-231 hypoxia fate-mapping CTCs. Cancer cell population was gated (R) in SSC versus FSC based on MDA-MB-231 cells. Gated region (R) is analyzed in terms of DsRed vs GFP. **c**, Ratio of DsRed+ and GFP+ cells in hypoxia fate-mapping 4T1 tumors in NSG mice resected 12 days post-implantation (mean  $\pm$  SEM, N=7); \*\*\*\* P<0.0001 GFP versus DsRed (two-tailed t-test). **d-e**, Lungs were harvested 2 weeks after tumor removal to be imaged for DsRed and GFP (**d**) and probability of metastatic events in the lung was obtained by normalizing number of detected colonies by percentage of cells present in the tumor using image analysis (**e**). **f**, Ratio of tdTom+ and GFP+ cells in the tumors of hypoxia fate-mapping triple-transgenic mice (mean  $\pm$  SEM, N=8); \*\*\*\* P<0.0001 GFP versus tdTom (two-tailed t-test). **g**, Cells recovered from a hypoxia fate-mapping MDA-MB-231 tumors were sorted directly into media (DsRed+/GFP- or GFP+) and maintained in culture. DsRed+ cells were exposed to 0.5% O<sub>2</sub> for 7 days and imaged for DsRed and GFP to show that they retain the ability to activate GFP expression under hypoxia.

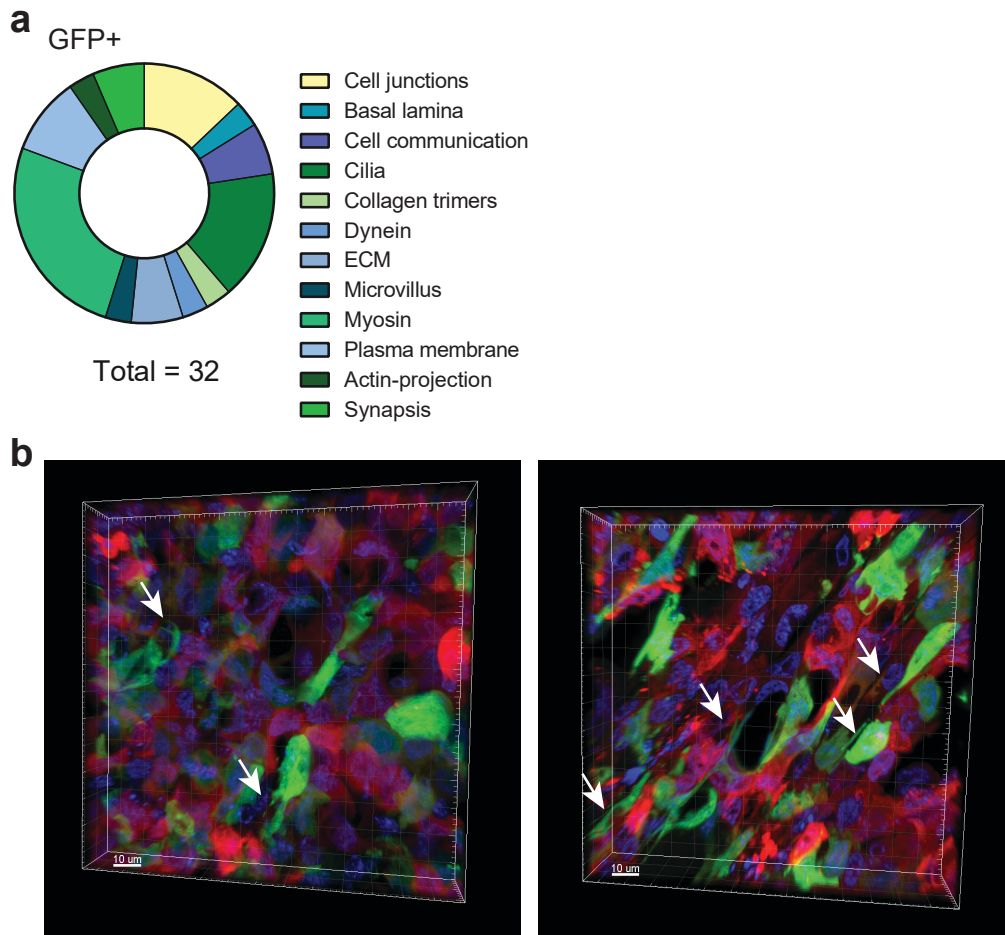

**Supplementary Figure 10. Post-hypoxic cells have enhanced invasion. a**, Gene Set Enrichment Analysis (GSEA) against GO – Cellular Component gene sets of GFP+ versus DsRed+ cancer cells isolated from harvested tumors. Enriched pathways with nominal p-value  $\leq 0.05$  were grouped into categories. **b**, 3D-reconstruction of cancer cells at the periphery of a tumor section stained with DAPI and mounted on a slide. Arrows indicate protrusions in GFP+ cells.

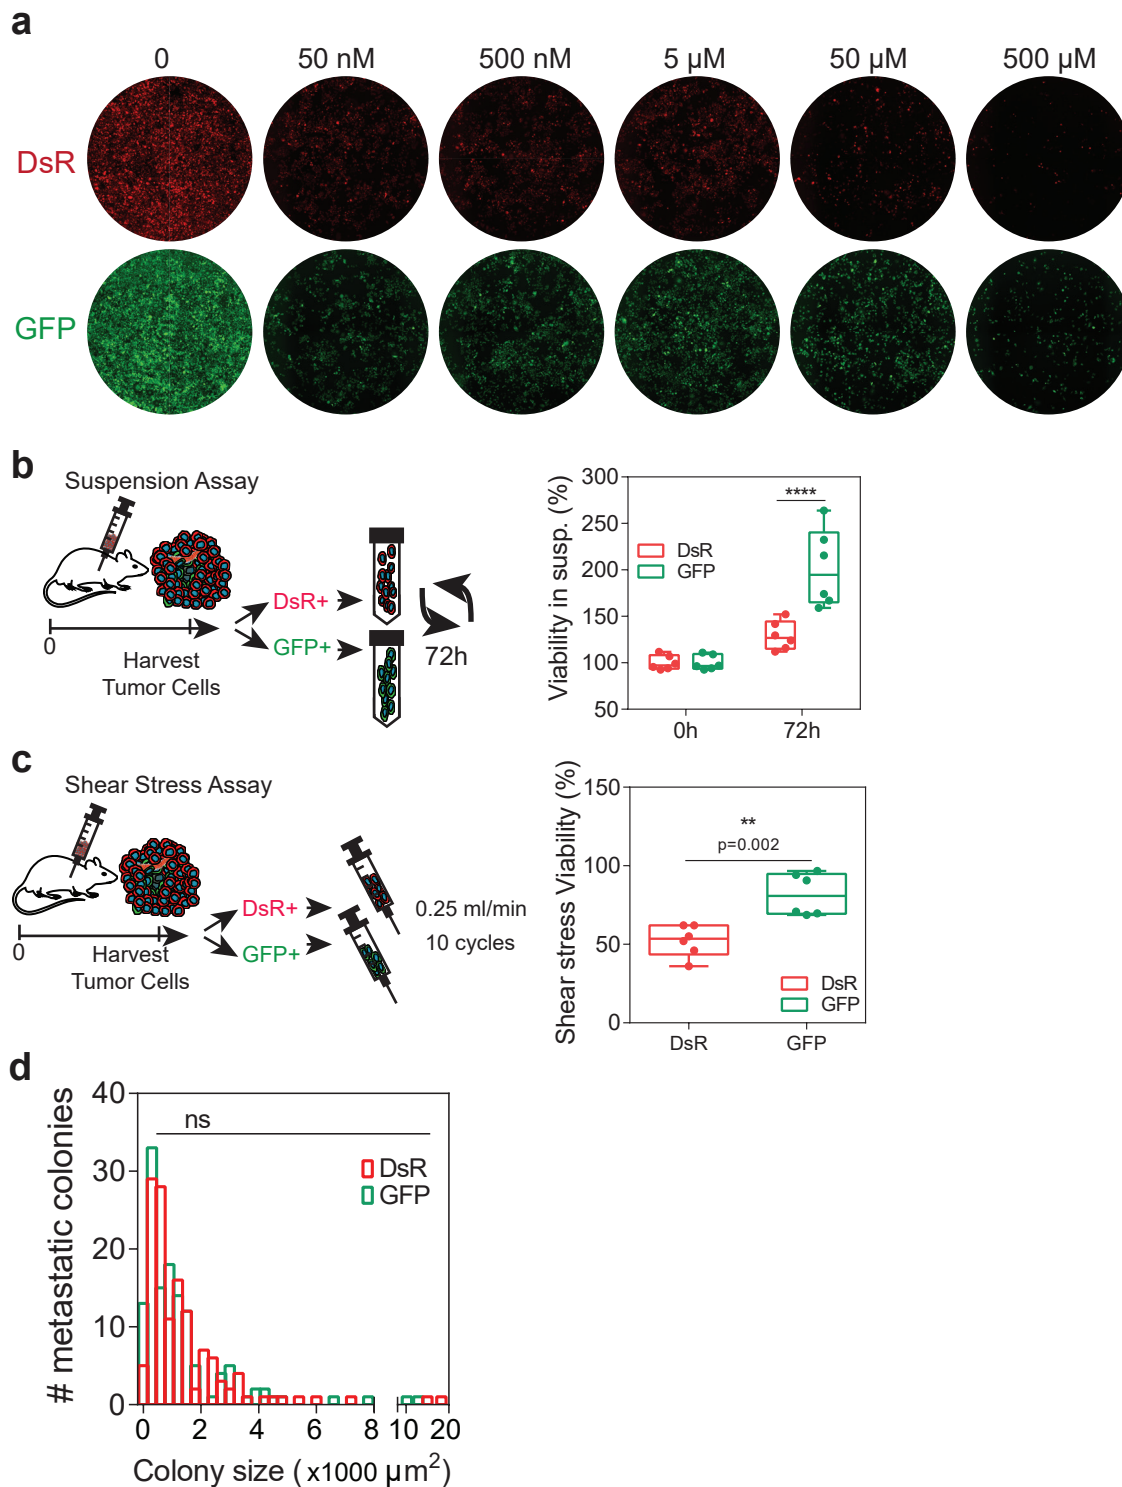

**Supplementary Figure 11. Post-hypoxic cells have ROS-resistant phenotype.** **a**, Fluorescent images of tumor-derived cells DsRed+ (DsR) or GFP+ imaged 48 h after 1 h of  $\text{H}_2\text{O}_2$  treatment. **b**, Tumor-derived cells were cultured in centrifuge tubes that were maintained in constant rotation under normal tissue culture conditions for 72 h. After 72 h, cells were plated, and confluency was assessed the following day by image analysis (N=2, n=6); \*\*\*\*  $P < 0.0001$  GFP versus DsRed (Two-way ANOVA with Bonferroni post-test). The box extends from the 25<sup>th</sup> to 75<sup>th</sup> percentiles, the median is marked by the vertical line inside the box, and the whiskers represent the minimum and maximum points. **c**, Tumor-derived cells were trypsinized and resuspended in fresh media. Shear stress was simulated by passing the cell suspension ( $1 \times 10^5/\text{ml}$ ) at a constant flow rate of 0.25 ml/s using a syringe. After 10 cycles, cells were counted with Trypan Blue (N=1, n=6); \*\*\*\*  $P < 0.0001$  GFP versus DsRed (two-tailed t-test). Box and whiskers plot is defined as described in (b). **d**, Colony size distribution in lungs of mice 25 days after tail vein injection of DsRed+ and GFP+ tumor-derived cells (N=1, n=9); \*\*\*\*  $P < 0.0001$  GFP versus DsRed (Mann-Whitney test).

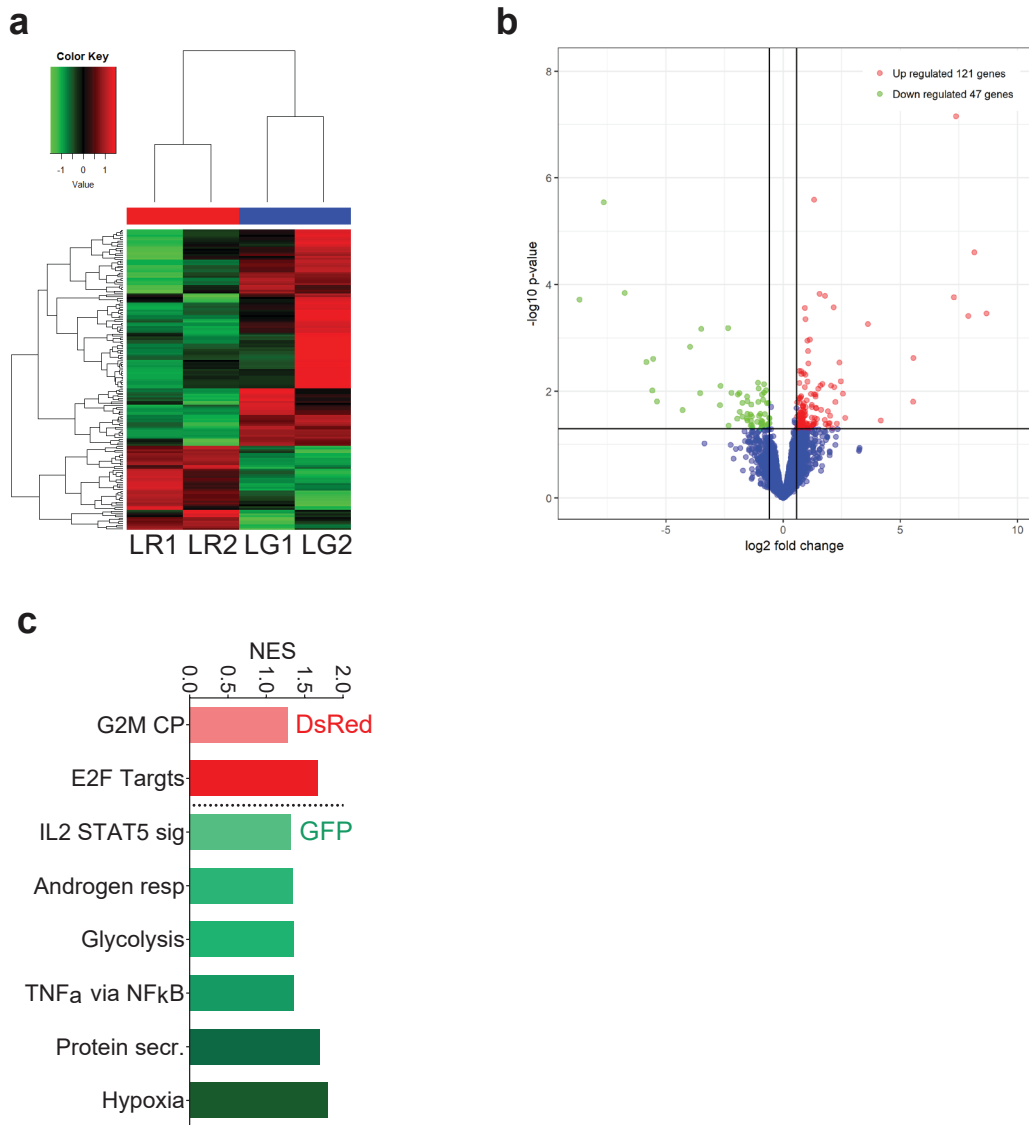

**Supplementary Figure 12. RNA sequencing of metastatic cells in the lung.** **a**, Heatmap of gene expression from RNA sequencing analysis which compares RNA expression in GFP+ metastatic cells (LG1 and LG2) to RNA expression in DsRed+ metastatic cells (LR1 and LR2). **b**, Volcano plot of gene expression from RNA sequencing analysis comparing GFP+ versus DsRed+ tumor cells. Green – down-regulated genes; Red – up-regulated genes ( $-1.5 \geq FC \geq 1.5$ ) and  $p\text{-value} < 0.05$ . **c**, Normalized enrichment scores (nominal  $p\text{-value} \leq 0.05$ ) derived from (Gene Set Enrichment Analysis) GSEA against Hallmark gene sets of DsRed+ and GFP+ cancer cells purified from resected lungs.

## Supplementary Tables

Supplementary Table 1 – Primers used for qPCR.

| Gene       | FW                     | RV                      |
|------------|------------------------|-------------------------|
| Actin (Ms) | GGCTGTATTCCCCTCCATCG   | CCAGTTGGTAACAATGCCATGT  |
| CA9        | GGATCTACCTACTGTTGAGGCT | CATAGCGCCAATGACTCTGGT   |
| CRE        | AGCCGAAATTGCCAGGAT     | AACCAGCGTTTTTCGTTCT     |
| CP         | CACGGGCAAGCACTGACTAA   | GGCCACCATATAAGCATCAAAC  |
| DNAH11     | CAACAGCTTACCTTTACCTGA  | TTCTTCCCATAAAGTAGCTTGCC |
| ENGLN3     | GGCTGGGCAAATACTACGTCAA | CCTGTTCCATTTCCCGGATAG   |
| GFP        | GACGACGGCAACTACAAGAC   | TCCTTGAAGTCGATGCCCTT    |
| ITGA10     | ACTTAGGTGACTACCAACGG   | CCACAAGCACGAGACCAG      |
| LOX        | GTTCCAAGCTGGCTACTC     | GGGTTGTCGTCAGAGTAC      |
| P4HA1 (Ms) | AGCCACCATTTCAAACCCAGT  | GCCAAGCACTTTTGCTAATTCTG |

Supplementary Table 2 – Primers used for genotyping.

| Sequence of interest | FW                       | RV                       |
|----------------------|--------------------------|--------------------------|
| MMTV-PYMT            | GGAAGCAAGTACTTCACAAGGG   | GGAAAGTCACTAGGAGCAGGG    |
| 4xHRE-MinTK-CRE-ODD  | CTGCTAACCATGTTTCATGCCTTC | GACGATGAAGCATGTTTAGCTGGC |

Supplementary Table 3 – Primers used for TLA sequencing.

| Sequence of interest   | FW                   | RV                    |
|------------------------|----------------------|-----------------------|
| Set 1 - bGlobin intron | AATACTCTGAGTCCAAACCG | TCGTTACAAATGCAAGCTAAA |
| Set 2 - Cre            | GGAGTTTCAATACCGGAGAT | ATTACGTATATCCTGGCAGC  |

Supplementary Table 4 – Results of RNA sequencing analysis of tumor samples, presented as the fold change (FC) of tumor GFP+ (TG) cells over tumor DsRed+ (TR) cells.  $-1.5 \geq FC \geq 1.5$  and  $p\text{-value} \leq 0.05$ .

| Gene_symbol | NAME                                     | Foldchange | PValue |
|-------------|------------------------------------------|------------|--------|
| PRH1        | proline-rich protein HaellI subfamily 1  | -3.175     | 0.019  |
| DGCR6       | DiGeorge syndrome critical region gene 6 | -2.939     | 0.028  |
| HOXC10      | homeobox C10                             | -2.742     | 0.020  |
| S100A5      | S100 calcium binding protein A5          | -2.524     | 0.018  |
| COMMD3-BMI1 | COMMD3-BMI1 readthrough                  | -2.501     | 0.018  |

|                |                                                                  |        |       |
|----------------|------------------------------------------------------------------|--------|-------|
| FAM45B         | family with sequence similarity 45, member B (pseudogene)        | -2.236 | 0.028 |
| GRM5-AS1       | GRM5 antisense RNA 1                                             | -2.187 | 0.046 |
| KRTAP2-3       | keratin associated protein 2-3                                   | -2.164 | 0.020 |
| APITD1-CORT    | APITD1-CORT readthrough                                          | -2.133 | 0.039 |
| RHEBL1         | Ras homolog enriched in brain like 1                             | -2.041 | 0.039 |
| B3GALT5        | UDP-Gal:betaGlcNAc beta 1,3-galactosyltransferase, polypeptide 5 | -2.032 | 0.047 |
| RTEL1-TNFRSF6B | RTEL1-TNFRSF6B readthrough (NMD candidate)                       | -2.024 | 0.011 |
| SPC24          | SPC24, NDC80 kinetochore complex component                       | -1.896 | 0.023 |
| FANCB          | Fanconi anemia, complementation group B                          | -1.876 | 0.040 |
| BATF3          | basic leucine zipper transcription factor, ATF-like 3            | -1.854 | 0.017 |
| DYX1C1         | dyslexia susceptibility 1 candidate 1                            | -1.851 | 0.032 |
| LOC100507002   | NA                                                               | -1.806 | 0.037 |
| CBR3           | carbonyl reductase 3                                             | -1.737 | 0.018 |
| FBP1           | fructose-1,6-bisphosphatase 1                                    | -1.733 | 0.037 |
| C16orf59       | chromosome 16 open reading frame 59                              | -1.724 | 0.017 |
| C7orf55-LUC7L2 | C7orf55-LUC7L2 readthrough                                       | -1.721 | 0.007 |
| MYBL2          | v-myb avian myeloblastosis viral oncogene homolog-like 2         | -1.714 | 0.005 |
| MNS1           | meiosis-specific nuclear structural 1                            | -1.685 | 0.046 |
| MYZAP          | myocardial zonula adherens protein                               | -1.676 | 0.042 |
| PTPRR          | protein tyrosine phosphatase, receptor type, R                   | -1.672 | 0.042 |
| UBE2T          | ubiquitin-conjugating enzyme E2T                                 | -1.656 | 0.008 |
| MND1           | meiotic nuclear divisions 1                                      | -1.650 | 0.018 |
| HAS3           | hyaluronan synthase 3                                            | -1.635 | 0.037 |
| CAMK4          | calcium/calmodulin-dependent protein kinase IV                   | -1.608 | 0.045 |
| GIN51          | GIN5 complex subunit 1 (Psf1 homolog)                            | -1.597 | 0.020 |
| CENPH          | centromere protein H                                             | -1.576 | 0.030 |
| BIRC5          | baculoviral IAP repeat containing 5                              | -1.569 | 0.020 |
| TK1            | thymidine kinase 1, soluble                                      | -1.555 | 0.022 |
| ATP6V0E2       | ATPase, H <sup>+</sup> transporting V0 subunit e2                | -1.555 | 0.039 |
| TIPIN          | TIMELESS interacting protein                                     | -1.548 | 0.033 |
| ASF1B          | anti-silencing function 1B histone chaperone                     | -1.546 | 0.034 |
| GCSH           | glycine cleavage system protein H (aminomethyl carrier)          | -1.545 | 0.035 |
| GIN52          | GIN5 complex subunit 2 (Psf2 homolog)                            | -1.544 | 0.036 |
| CDC45          | cell division cycle 45                                           | -1.540 | 0.027 |
| ABRACL         | ABRA C-terminal like                                             | -1.539 | 0.031 |
| CDC20          | cell division cycle 20                                           | -1.529 | 0.034 |
| CDKN3          | cyclin-dependent kinase inhibitor 3                              | -1.526 | 0.045 |
| NRGN           | neurogranin (protein kinase C substrate, RC3)                    | -1.522 | 0.028 |
| PLK1           | polo-like kinase 1                                               | -1.517 | 0.024 |

|              |                                                                   |        |       |
|--------------|-------------------------------------------------------------------|--------|-------|
| CDCA3        | cell division cycle associated 3                                  | -1.514 | 0.043 |
| ZWINT        | ZW10 interacting kinetochore protein                              | -1.513 | 0.019 |
| GTSE1        | G-2 and S-phase expressed 1                                       | -1.504 | 0.029 |
| AURKB        | aurora kinase B                                                   | -1.501 | 0.044 |
| KIF24        | kinesin family member 24                                          | -1.500 | 0.046 |
| ZEB2         | zinc finger E-box binding homeobox 2                              | 1.506  | 0.045 |
| CCL5         | chemokine (C-C motif) ligand 5                                    | 1.507  | 0.034 |
| PARP14       | poly (ADP-ribose) polymerase family, member 14                    | 1.511  | 0.037 |
| GABPB1-AS1   | GABPB1 antisense RNA 1                                            | 1.511  | 0.029 |
| SNED1        | sushi, nidogen and EGF-like domains 1                             | 1.516  | 0.028 |
| LOC100289019 | NA                                                                | 1.517  | 0.046 |
| BMI1         | BMI1 proto-oncogene, polycomb ring finger                         | 1.521  | 0.049 |
| HSF4         | heat shock transcription factor 4                                 | 1.525  | 0.041 |
| TNXB         | tenascin XB                                                       | 1.528  | 0.023 |
| IL1RAP       | interleukin 1 receptor accessory protein                          | 1.536  | 0.040 |
| C1R          | complement component 1, r subcomponent                            | 1.548  | 0.042 |
| LINC00649    | long intergenic non-protein coding RNA 649                        | 1.560  | 0.048 |
| LRP1         | low density lipoprotein receptor-related protein 1                | 1.562  | 0.018 |
| MUC1         | mucin 1, cell surface associated                                  | 1.564  | 0.015 |
| FAM126B      | family with sequence similarity 126, member B                     | 1.570  | 0.048 |
| ITGA10       | integrin, alpha 10                                                | 1.572  | 0.016 |
| SLFN5        | schlafen family member 5                                          | 1.575  | 0.024 |
| CFB          | complement factor B                                               | 1.579  | 0.003 |
| SLC26A1      | solute carrier family 26 (anion exchanger), member 1              | 1.586  | 0.050 |
| NDRG1        | N-myc downstream regulated 1                                      | 1.586  | 0.008 |
| SMG7         | SMG7 nonsense mediated mRNA decay factor                          | 1.589  | 0.007 |
| PLSCR4       | phospholipid scramblase 4                                         | 1.592  | 0.044 |
| ZNF432       | zinc finger protein 432                                           | 1.596  | 0.040 |
| ZNF550       | zinc finger protein 550                                           | 1.597  | 0.029 |
| C6orf141     | chromosome 6 open reading frame 141                               | 1.598  | 0.018 |
| HMBOX1       | homeobox containing 1                                             | 1.602  | 0.044 |
| ZNF791       | zinc finger protein 791                                           | 1.608  | 0.041 |
| ZNF426       | zinc finger protein 426                                           | 1.612  | 0.045 |
| PPARA        | peroxisome proliferator-activated receptor alpha                  | 1.619  | 0.030 |
| KCNQ1OT1     | KCNQ1 opposite strand/antisense transcript 1 (non-protein coding) | 1.620  | 0.041 |
| TMEM45A      | transmembrane protein 45A                                         | 1.622  | 0.041 |
| RNASE4       | ribonuclease, RNase A family, 4                                   | 1.628  | 0.043 |
| BMS1P4       | BMS1 ribosome biogenesis factor pseudogene 4                      | 1.633  | 0.040 |
| IFI44L       | interferon-induced protein 44-like                                | 1.639  | 0.032 |
| NEAT1        | nuclear paraspeckle assembly transcript 1 (non-protein coding)    | 1.643  | 0.048 |



|              |                                                                                       |       |       |
|--------------|---------------------------------------------------------------------------------------|-------|-------|
| PCDHB14      | protocadherin beta 14                                                                 | 1.649 | 0.030 |
| LOC101928936 | NA                                                                                    | 1.654 | 0.036 |
| EXD1         | exonuclease 3'-5' domain containing 1                                                 | 1.654 | 0.028 |
| LRRC24       | leucine rich repeat containing 24                                                     | 1.656 | 0.033 |
| LOC100131257 | NA                                                                                    | 1.657 | 0.033 |
| RPL32P3      | ribosomal protein L32 pseudogene 3                                                    | 1.658 | 0.048 |
| TTC30A       | tetratricopeptide repeat domain 30A                                                   | 1.662 | 0.035 |
| ZNF81        | zinc finger protein 81                                                                | 1.666 | 0.039 |
| ARPC4-TTLL3  | ARPC4-TTLL3 readthrough                                                               | 1.666 | 0.048 |
| UCKL1-AS1    | UCKL1 antisense RNA 1                                                                 | 1.671 | 0.015 |
| LOC90834     | NA                                                                                    | 1.678 | 0.027 |
| MALAT1       | metastasis associated lung adenocarcinoma transcript 1 (non-protein coding)           | 1.681 | 0.021 |
| ASTN2        | astrotactin 2                                                                         | 1.692 | 0.031 |
| LOC100630923 | NA                                                                                    | 1.693 | 0.026 |
| LOC100288069 | NA                                                                                    | 1.695 | 0.034 |
| FN1          | fibronectin 1                                                                         | 1.695 | 0.002 |
| PLA2R1       | phospholipase A2 receptor 1, 180kDa                                                   | 1.698 | 0.010 |
| BMS1P5       | BMS1 ribosome biogenesis factor pseudogene 5                                          | 1.702 | 0.018 |
| BMS1P6       | BMS1 ribosome biogenesis factor pseudogene 6                                          | 1.705 | 0.018 |
| CA9          | carbonic anhydrase IX                                                                 | 1.708 | 0.006 |
| ZNF91        | zinc finger protein 91                                                                | 1.715 | 0.019 |
| LOC646214    | NA                                                                                    | 1.720 | 0.042 |
| LOC101928600 | NA                                                                                    | 1.726 | 0.017 |
| FAM13A       | family with sequence similarity 13, member A                                          | 1.728 | 0.012 |
| HSD3BP4      | hydroxy-delta-5-steroid dehydrogenase, 3 beta, pseudogene 4                           | 1.730 | 0.031 |
| EXPH5        | exophilin 5                                                                           | 1.736 | 0.010 |
| RBM43        | RNA binding motif protein 43                                                          | 1.739 | 0.043 |
| LOC646471    | NA                                                                                    | 1.739 | 0.049 |
| FAM63B       | family with sequence similarity 63, member B                                          | 1.741 | 0.049 |
| ZNF708       | zinc finger protein 708                                                               | 1.743 | 0.029 |
| CCDC68       | coiled-coil domain containing 68                                                      | 1.743 | 0.048 |
| IL18BP       | interleukin 18 binding protein                                                        | 1.755 | 0.018 |
| LINC00506    | long intergenic non-protein coding RNA 506                                            | 1.755 | 0.012 |
| CPEB4        | cytoplasmic polyadenylation element binding protein 4                                 | 1.759 | 0.015 |
| PTGFR        | prostaglandin F receptor (FP)                                                         | 1.762 | 0.048 |
| LINC00174    | long intergenic non-protein coding RNA 174                                            | 1.764 | 0.042 |
| LOC101926889 | NA                                                                                    | 1.764 | 0.020 |
| CAPRN2       | caprin family member 2                                                                | 1.766 | 0.016 |
| PTGS2        | prostaglandin-endoperoxide synthase 2 (prostaglandin G/H synthase and cyclooxygenase) | 1.774 | 0.001 |
| USP32P2      | ubiquitin specific peptidase 32 pseudogene 2                                          | 1.775 | 0.049 |

|              |                                                                                                           |       |       |
|--------------|-----------------------------------------------------------------------------------------------------------|-------|-------|
| ANKRD36B     | ankyrin repeat domain 36B                                                                                 | 1.788 | 0.012 |
| DNAH1        | dynein, axonemal, heavy chain 1                                                                           | 1.790 | 0.006 |
| PPFIA4       | protein tyrosine phosphatase, receptor type, f polypeptide (PTPRF), interacting protein (liprin), alpha 4 | 1.792 | 0.009 |
| KDM7A        | lysine (K)-specific demethylase 7A                                                                        | 1.799 | 0.031 |
| ZNF224       | zinc finger protein 224                                                                                   | 1.802 | 0.030 |
| ZNF460       | zinc finger protein 460                                                                                   | 1.811 | 0.014 |
| ZNF235       | zinc finger protein 235                                                                                   | 1.813 | 0.034 |
| TSSK3        | testis-specific serine kinase 3                                                                           | 1.814 | 0.030 |
| ZCWPW1       | zinc finger, CW type with PWWP domain 1                                                                   | 1.816 | 0.049 |
| LOC101928137 | NA                                                                                                        | 1.832 | 0.041 |
| ZNF121       | zinc finger protein 121                                                                                   | 1.833 | 0.017 |
| AMT          | aminomethyltransferase                                                                                    | 1.841 | 0.022 |
| ZNF439       | zinc finger protein 439                                                                                   | 1.842 | 0.048 |
| KBTBD12      | kelch repeat and BTB (POZ) domain containing 12                                                           | 1.843 | 0.009 |
| GRTP1        | growth hormone regulated TBC protein 1                                                                    | 1.846 | 0.021 |
| MTUS1        | microtubule associated tumor suppressor 1                                                                 | 1.847 | 0.017 |
| DUXA         | double homeobox A                                                                                         | 1.849 | 0.042 |
| TRIM66       | tripartite motif containing 66                                                                            | 1.857 | 0.006 |
| OTUD6A       | OTU deubiquitinase 6A                                                                                     | 1.876 | 0.026 |
| IDI2         | isopentenyl-diphosphate delta isomerase 2                                                                 | 1.880 | 0.031 |
| MMP10        | matrix metalloproteinase 10                                                                               | 1.887 | 0.047 |
| EGLN3        | egl-9 family hypoxia-inducible factor 3                                                                   | 1.911 | 0.010 |
| SCG2         | secretogranin II                                                                                          | 1.915 | 0.038 |
| LOC401320    | NA                                                                                                        | 1.917 | 0.019 |
| DNAH11       | dynein, axonemal, heavy chain 11                                                                          | 1.920 | 0.014 |
| MAP1LC3C     | microtubule-associated protein 1 light chain 3 gamma                                                      | 1.924 | 0.005 |
| ZNF204P      | zinc finger protein 204, pseudogene                                                                       | 1.932 | 0.034 |
| LRRC37A      | leucine rich repeat containing 37A                                                                        | 1.934 | 0.050 |
| PARGP1       | poly (ADP-ribose) glycohydrolase pseudogene 1                                                             | 1.942 | 0.032 |
| LINC00319    | long intergenic non-protein coding RNA 319                                                                | 1.945 | 0.048 |
| GOLGA8B      | golgin A8 family, member B                                                                                | 1.949 | 0.015 |
| SEC31B       | SEC31 homolog B, COPII coat complex component                                                             | 1.954 | 0.004 |
| AHRR         | aryl-hydrocarbon receptor repressor                                                                       | 1.956 | 0.025 |
| KIAA1614     | KIAA1614                                                                                                  | 1.965 | 0.021 |
| INHA         | inhibin, alpha                                                                                            | 1.969 | 0.033 |
| NYAP2        | neuronal tyrosine-phosphorylated phosphoinositide-3-kinase adaptor 2                                      | 1.969 | 0.037 |
| WNT2B        | wingless-type MMTV integration site family, member 2B                                                     | 1.989 | 0.026 |
| CCDC144B     | coiled-coil domain containing 144B (pseudogene)                                                           | 1.999 | 0.016 |

|                 |                                                                                       |       |       |
|-----------------|---------------------------------------------------------------------------------------|-------|-------|
| PTGS1           | prostaglandin-endoperoxide synthase 1 (prostaglandin G/H synthase and cyclooxygenase) | 2.007 | 0.034 |
| C9orf9          | chromosome 9 open reading frame 9                                                     | 2.008 | 0.029 |
| FAM227A         | family with sequence similarity 227, member A                                         | 2.010 | 0.030 |
| SH3D21          | SH3 domain containing 21                                                              | 2.016 | 0.022 |
| LOC100132062    | NA                                                                                    | 2.017 | 0.001 |
| TMEM145         | transmembrane protein 145                                                             | 2.032 | 0.028 |
| SSC5D           | scavenger receptor cysteine rich family, 5 domains                                    | 2.052 | 0.005 |
| TNFSF10         | tumor necrosis factor (ligand) superfamily, member 10                                 | 2.055 | 0.028 |
| LOC100190986    | NA                                                                                    | 2.057 | 0.008 |
| TTN             | titin                                                                                 | 2.081 | 0.012 |
| LOC100131564    | NA                                                                                    | 2.084 | 0.023 |
| LOX             | lysyl oxidase                                                                         | 2.105 | 0.002 |
| NLRP12          | NLR family, pyrin domain containing 12                                                | 2.114 | 0.002 |
| C1S             | complement component 1, s subcomponent                                                | 2.117 | 0.003 |
| LINC00458       | long intergenic non-protein coding RNA 458                                            | 2.117 | 0.008 |
| RPLP0P2         | ribosomal protein, large, P0 pseudogene 2                                             | 2.122 | 0.022 |
| DNAH7           | dynein, axonemal, heavy chain 7                                                       | 2.131 | 0.007 |
| ZNF616          | zinc finger protein 616                                                               | 2.150 | 0.018 |
| CSAD            | cysteine sulfinic acid decarboxylase                                                  | 2.173 | 0.003 |
| USP32P1         | ubiquitin specific peptidase 32 pseudogene 1                                          | 2.187 | 0.008 |
| GUSBP3          | glucuronidase, beta pseudogene 3                                                      | 2.190 | 0.002 |
| FAM71F2         | family with sequence similarity 71, member F2                                         | 2.194 | 0.025 |
| PCDHGB3         | protocadherin gamma subfamily B, 3                                                    | 2.202 | 0.036 |
| ZC3H12B         | zinc finger CCCH-type containing 12B                                                  | 2.204 | 0.034 |
| RORA            | RAR-related orphan receptor A                                                         | 2.213 | 0.015 |
| ATP6V1G2-DDX39B | ATP6V1G2-DDX39B readthrough (NMD candidate)                                           | 2.226 | 0.002 |
| SMG1P1          | SMG1 pseudogene 1                                                                     | 2.229 | 0.001 |
| JAK3            | Janus kinase 3                                                                        | 2.233 | 0.008 |
| ABCA1           | ATP-binding cassette, sub-family A (ABC1), member 1                                   | 2.235 | 0.009 |
| CNTN4           | contactin 4                                                                           | 2.236 | 0.022 |
| ZNF818P         | zinc finger protein 818, pseudogene                                                   | 2.257 | 0.014 |
| LRRC56          | leucine rich repeat containing 56                                                     | 2.258 | 0.013 |
| LOC100506551    | NA                                                                                    | 2.260 | 0.041 |
| SLC9A4          | solute carrier family 9, subfamily A (NHE4, cation proton antiporter 4), member 4     | 2.263 | 0.015 |
| BACE1-AS        | BACE1 antisense RNA                                                                   | 2.265 | 0.035 |
| LINC00926       | long intergenic non-protein coding RNA 926                                            | 2.267 | 0.026 |
| KCND1           | potassium channel, voltage gated Shal related subfamily D, member 1                   | 2.270 | 0.013 |
| LOC100996251    | NA                                                                                    | 2.270 | 0.038 |
| SPERT           | spermatid associated                                                                  | 2.279 | 0.032 |
| TBX6            | T-box 6                                                                               | 2.288 | 0.011 |

|              |                                                                                                                  |       |       |
|--------------|------------------------------------------------------------------------------------------------------------------|-------|-------|
| MST1         | macrophage stimulating 1                                                                                         | 2.325 | 0.001 |
| RASA4B       | RAS p21 protein activator 4B                                                                                     | 2.331 | 0.019 |
| COL11A2      | collagen, type XI, alpha 2                                                                                       | 2.363 | 0.043 |
| LRRC3        | leucine rich repeat containing 3                                                                                 | 2.402 | 0.027 |
| HS3ST3A1     | heparan sulfate (glucosamine) 3-O-sulfotransferase 3A1                                                           | 2.404 | 0.049 |
| PKHD1        | polycystic kidney and hepatic disease 1 (autosomal recessive)                                                    | 2.425 | 0.032 |
| GSDMB        | gasdermin B                                                                                                      | 2.428 | 0.041 |
| LINC01207    | long intergenic non-protein coding RNA 1207                                                                      | 2.440 | 0.032 |
| ELOVL7       | ELOVL fatty acid elongase 7                                                                                      | 2.450 | 0.016 |
| HIST2H3D     | histone cluster 2, H3d                                                                                           | 2.457 | 0.006 |
| TMEM178A     | transmembrane protein 178A                                                                                       | 2.497 | 0.029 |
| FRY          | furry homolog (Drosophila)                                                                                       | 2.500 | 0.003 |
| MSS51        | MSS51 mitochondrial translational activator                                                                      | 2.534 | 0.016 |
| LOC100130451 | NA                                                                                                               | 2.551 | 0.016 |
| MSH5-SAPCD1  | MSH5-SAPCD1 readthrough (NMD candidate)                                                                          | 2.564 | 0.021 |
| SKIDA1       | SKI/DACH domain containing 1                                                                                     | 2.565 | 0.036 |
| MUC15        | mucin 15, cell surface associated                                                                                | 2.577 | 0.020 |
| EBLN2        | endogenous Bornavirus-like nucleoprotein 2                                                                       | 2.623 | 0.046 |
| SEMA4A       | sema domain, immunoglobulin domain (Ig), transmembrane domain (TM) and short cytoplasmic domain, (semaphorin) 4A | 2.669 | 0.013 |
| SEN3-EIF4A1  | SEN3-EIF4A1 readthrough (NMD candidate)                                                                          | 2.737 | 0.002 |
| GPC2         | glypican 2                                                                                                       | 2.760 | 0.029 |
| TMEM236      | transmembrane protein 236                                                                                        | 2.770 | 0.020 |
| KCNQ3        | potassium channel, voltage gated KQT-like subfamily Q, member 3                                                  | 2.795 | 0.002 |
| DNAJC9-AS1   | DNAJC9 antisense RNA 1                                                                                           | 2.803 | 0.017 |
| APOL4        | apolipoprotein L, 4                                                                                              | 2.804 | 0.002 |
| ANKRD20A12P  | ankyrin repeat domain 20 family, member A12, pseudogene                                                          | 2.824 | 0.014 |
| LOC100289511 | NA                                                                                                               | 2.837 | 0.002 |
| PCDHGA7      | protocadherin gamma subfamily A, 7                                                                               | 2.886 | 0.009 |
| LOC101929698 | NA                                                                                                               | 2.892 | 0.011 |
| BAGE2        | B melanoma antigen family, member 2                                                                              | 2.896 | 0.014 |
| BAGE3        | B melanoma antigen family, member 3                                                                              | 2.896 | 0.014 |
| LOC100505817 | NA                                                                                                               | 2.913 | 0.025 |
| AGBL2        | ATP/GTP binding protein-like 2                                                                                   | 2.926 | 0.026 |
| CAND2        | cullin-associated and neddylation-dissociated 2 (putative)                                                       | 2.963 | 0.009 |
| MIRLET7DHG   | MIRLET7D host gene                                                                                               | 3.008 | 0.015 |
| CCDC183      | coiled-coil domain containing 183                                                                                | 3.034 | 0.002 |
| GADD45G      | growth arrest and DNA-damage-inducible, gamma                                                                    | 3.137 | 0.015 |
| LOC100996291 | NA                                                                                                               | 3.166 | 0.039 |

|                 |                                                        |         |       |
|-----------------|--------------------------------------------------------|---------|-------|
| SLC7A11-AS1     | SLC7A11 antisense RNA 1                                | 3.207   | 0.002 |
| ANKRD20A5P      | ankyrin repeat domain 20 family, member A5, pseudogene | 3.228   | 0.001 |
| CCDC144CP       | coiled-coil domain containing 144C, pseudogene         | 3.274   | 0.020 |
| ADAM28          | ADAM metallopeptidase domain 28                        | 3.286   | 0.026 |
| FER1L4          | fer-1-like family member 4, pseudogene (functional)    | 3.308   | 0.000 |
| BREA2           | breast cancer estrogen-induced apoptosis 2             | 3.309   | 0.008 |
| CDKN2B-AS1      | CDKN2B antisense RNA 1                                 | 3.742   | 0.034 |
| PSORS1C2        | psoriasis susceptibility 1 candidate 2                 | 3.771   | 0.014 |
| GCOM1           | GRINL1A complex locus 1                                | 4.241   | 0.039 |
| RAPGEF4         | Rap guanine nucleotide exchange factor (GEF) 4         | 4.260   | 0.003 |
| LINC01209       | long intergenic non-protein coding RNA 1209            | 4.448   | 0.008 |
| CHRNA10         | cholinergic receptor, nicotinic, alpha 10 (neuronal)   | 4.666   | 0.004 |
| RBAK-RBAKDN     | RBAK-RBAKDN readthrough                                | 4.789   | 0.029 |
| LOC100272216    | NA                                                     | 4.898   | 0.004 |
| CTAGE8          | CTAGE family, member 8                                 | 5.148   | 0.001 |
| PCDHGB6         | protocadherin gamma subfamily B, 6                     | 5.582   | 0.000 |
| CP              | ceruloplasmin (ferroxidase)                            | 5.914   | 0.000 |
| JMJD7-PLA2G4B   | JMJD7-PLA2G4B readthrough                              | 6.440   | 0.006 |
| CAMK2B          | calcium/calmodulin-dependent protein kinase II beta    | 6.537   | 0.001 |
| STAC2           | SH3 and cysteine rich domain 2                         | 10.771  | 0.000 |
| C8orf44-SGK3    | C8orf44-SGK3 readthrough                               | 11.959  | 0.000 |
| SPECC1L-ADORA2A | SPECC1L-ADORA2A readthrough (NMD candidate)            | 131.588 | 0.000 |
| NARR            | NA                                                     | 149.577 | 0.000 |

Supplementary Table 5 – GSEA Enrichment Analysis investigating Hallmark Pathways in sorted tumor samples GFP+ (TG) or DsRed+ (TR). Highlighted in green are the hallmarks with p-values $\leq$ 0.05 and FDR $\leq$ 0.25.

a) Enrichment in GFP+ tumor cells (TG)

| NAME                               | SIZE | ES           | NES          | NOM p-val    | FDR q-val    | FWER p-val | RANK AT MAX |
|------------------------------------|------|--------------|--------------|--------------|--------------|------------|-------------|
| HALLMARK_HYPOXIA                   | 199  | 0.461<br>273 | 1.530<br>811 | 0.0012<br>21 | 0.104<br>524 | 0.13       | 5992        |
| HALLMARK_KRAS_SIGNALING_UP         | 199  | 0.387<br>559 | 1.283<br>896 | 0.0357<br>58 | 0.875<br>634 | 0.908      | 5451        |
| HALLMARK_UV_RESPONSE_DN            | 144  | 0.392<br>945 | 1.270<br>089 | 0.0646<br>77 | 0.663<br>513 | 0.939      | 6165        |
| HALLMARK_INTERFERON_GAMMA_RESPONSE | 197  | 0.363<br>632 | 1.208<br>407 | 0.0989<br>14 | 0.860<br>122 | 0.993      | 5079        |
| HALLMARK_TGF_BETA_SIGNALING        | 54   | 0.421<br>787 | 1.189<br>926 | 0.2          | 0.802<br>027 | 0.999      | 6023        |

|                                                |     |              |              |              |              |   |      |
|------------------------------------------------|-----|--------------|--------------|--------------|--------------|---|------|
| HALLMARK_COAGULATION                           | 136 | 0.356<br>738 | 1.148<br>072 | 0.1992<br>08 | 0.938<br>739 | 1 | 5288 |
| HALLMARK_KRAS_SIGNALING_DN                     | 195 | 0.342<br>328 | 1.129<br>536 | 0.1908<br>76 | 0.917<br>909 | 1 | 4585 |
| HALLMARK_MYOGENESIS                            | 200 | 0.326<br>941 | 1.094<br>13  | 0.2599<br>01 | 1            | 1 | 4553 |
| HALLMARK_APICAL_SURFACE                        | 44  | 0.396<br>621 | 1.091<br>559 | 0.3237<br>08 | 0.922<br>099 | 1 | 4835 |
| HALLMARK_TNFA_SIGNALING_VIA_NF<br>KB           | 199 | 0.327<br>551 | 1.090<br>394 | 0.2651<br>33 | 0.834<br>639 | 1 | 6033 |
| HALLMARK_HEDGEHOG_SIGNALING                    | 36  | 0.407<br>156 | 1.076<br>439 | 0.3582<br>55 | 0.830<br>197 | 1 | 4046 |
| HALLMARK_EPITHELIAL_MESENCHYM<br>AL_TRANSITION | 198 | 0.322<br>281 | 1.073<br>618 | 0.3087<br>33 | 0.773<br>852 | 1 | 5955 |
| HALLMARK_INTERFERON_ALPHA_RES<br>PONSE         | 94  | 0.348<br>565 | 1.058<br>874 | 0.3431<br>24 | 0.780<br>835 | 1 | 5910 |
| HALLMARK_ANGIOGENESIS                          | 36  | 0.399<br>743 | 1.052<br>746 | 0.3818<br>47 | 0.751<br>164 | 1 | 5681 |
| HALLMARK_PROTEIN_SECRETION                     | 96  | 0.343<br>14  | 1.050<br>399 | 0.3579<br>92 | 0.711<br>255 | 1 | 5081 |
| HALLMARK_INFLAMMATORY_RESPON<br>SE             | 198 | 0.277<br>283 | 0.917<br>792 | 0.6658<br>68 | 1            | 1 | 4257 |
| HALLMARK_ANDROGEN_RESPONSE                     | 101 | 0.293<br>542 | 0.901<br>939 | 0.6662<br>34 | 1            | 1 | 4079 |
| HALLMARK_IL6_JAK_STAT3_SIGNALIN<br>G           | 87  | 0.294<br>815 | 0.892<br>237 | 0.6732<br>28 | 1            | 1 | 4320 |
| HALLMARK_COMPLEMENT                            | 196 | 0.259<br>563 | 0.858<br>963 | 0.8124<br>24 | 1            | 1 | 4294 |
| HALLMARK_HEME_METABOLISM                       | 195 | 0.254<br>664 | 0.843<br>726 | 0.8454<br>11 | 1            | 1 | 5951 |
| HALLMARK_IL2_STAT5_SIGNALING                   | 199 | 0.247<br>446 | 0.827<br>813 | 0.8816<br>28 | 1            | 1 | 5033 |
| HALLMARK_APOPTOSIS                             | 160 | 0.253<br>262 | 0.825<br>132 | 0.8629<br>44 | 1            | 1 | 4654 |
| HALLMARK_MITOTIC_SPINDLE                       | 198 | 0.241<br>574 | 0.805<br>556 | 0.9238<br>21 | 1            | 1 | 6005 |
| HALLMARK_BILE_ACID_METABOLISM                  | 112 | 0.256<br>948 | 0.800<br>65  | 0.8918<br>21 | 1            | 1 | 3647 |
| HALLMARK_ALLOGRAFT_REJECTION                   | 200 | 0.232<br>496 | 0.775<br>823 | 0.9673<br>12 | 1            | 1 | 5182 |
| HALLMARK_GLYCOLYSIS                            | 199 | 0.224<br>532 | 0.753<br>46  | 0.9795<br>92 | 1            | 1 | 4570 |
| HALLMARK_APICAL_JUNCTION                       | 200 | 0.224<br>096 | 0.748<br>908 | 0.9865<br>2  | 1            | 1 | 4442 |
| HALLMARK_NOTCH_SIGNALING                       | 32  | 0.287<br>019 | 0.737<br>307 | 0.8784       | 1            | 1 | 7614 |
| HALLMARK_ESTROGEN_RESPONSE_E<br>ARLY           | 200 | 0.218<br>621 | 0.720<br>617 | 0.9916<br>67 | 1            | 1 | 5797 |
| HALLMARK_PANCREAS_BETA_CELLS                   | 40  | 0.248<br>845 | 0.670<br>079 | 0.9684<br>04 | 0.993<br>925 | 1 | 2624 |

b) Enrichment in DsRed+ tumor cells (TR)

| NAME                                     | SIZE | ES           | NES          | NOM p-val    | FDR q-val    | FWER p-val | RANK AT MAX |
|------------------------------------------|------|--------------|--------------|--------------|--------------|------------|-------------|
| HALLMARK_E2F_TARGETS                     | 199  | 0.715<br>396 | 2.744<br>474 | 0            | 0            | 0          | 4045        |
| HALLMARK_MYC_TARGETS_V1                  | 199  | 0.712<br>03  | 2.711<br>706 | 0            | 0            | 0          | 5035        |
| HALLMARK_OXIDATIVE_PHOSPHORYLATION       | 199  | 0.680<br>298 | 2.605<br>333 | 0            | 0            | 0          | 5738        |
| HALLMARK_G2M_CHECKPOINT                  | 200  | 0.613<br>16  | 2.363<br>222 | 0            | 0            | 0          | 4086        |
| HALLMARK_MYC_TARGETS_V2                  | 58   | 0.702<br>24  | 2.275<br>379 | 0            | 0            | 0          | 5675        |
| HALLMARK_DNA_REPAIR                      | 143  | 0.587<br>405 | 2.171<br>609 | 0            | 0            | 0          | 5461        |
| HALLMARK_REACTIVE_OXIGEN_SPECIES_PATHWAY | 47   | 0.585<br>989 | 1.792<br>009 | 0            | 2.60<br>E-04 | 0.001      | 5720        |
| HALLMARK_MTORC1_SIGNALING                | 199  | 0.447<br>233 | 1.735<br>374 | 0            | 0.001<br>346 | 0.006      | 6592        |
| HALLMARK_FATTY_ACID_METABOLISM           | 158  | 0.436<br>888 | 1.639<br>641 | 0            | 0.003<br>254 | 0.017      | 5239        |
| HALLMARK_ADIPOGENESIS                    | 196  | 0.419<br>265 | 1.608<br>216 | 0            | 0.004<br>531 | 0.027      | 6430        |
| HALLMARK_UNFOLDED_PROTEIN_RESPONSE       | 112  | 0.422<br>675 | 1.534<br>899 | 0            | 0.007<br>613 | 0.047      | 6435        |
| HALLMARK_ESTROGEN_RESPONSE_LATE          | 199  | 0.393<br>403 | 1.489<br>699 | 0            | 0.009<br>556 | 0.064      | 5377        |
| HALLMARK_XENOBIOTIC_METABOLISM           | 199  | 0.370<br>87  | 1.428<br>545 | 0            | 0.015<br>292 | 0.109      | 5004        |
| HALLMARK_PEROXISOME                      | 103  | 0.388<br>516 | 1.348<br>908 | 0.0114<br>94 | 0.035<br>281 | 0.25       | 5884        |
| HALLMARK_UV_RESPONSE_UP                  | 156  | 0.345<br>333 | 1.289<br>185 | 0.0374<br>33 | 0.056<br>717 | 0.385      | 5420        |
| HALLMARK_PI3K_AKT_MTOR_SIGNALING         | 105  | 0.348<br>908 | 1.230<br>824 | 0.0875<br>91 | 0.089<br>077 | 0.553      | 4536        |
| HALLMARK_SPERMATOGENESIS                 | 133  | 0.331<br>812 | 1.226<br>506 | 0.0821<br>92 | 0.086<br>546 | 0.567      | 2508        |
| HALLMARK_CHOLESTEROL_HOMEOSTASIS         | 73   | 0.355<br>196 | 1.173<br>443 | 0.1408<br>93 | 0.130<br>512 | 0.728      | 4675        |
| HALLMARK_P53_PATHWAY                     | 199  | 0.285<br>176 | 1.085<br>42  | 0.2113<br>4  | 0.245<br>589 | 0.93       | 5709        |
| HALLMARK_WNT_BETA_CATENIN_SIGNALING      | 42   | 0.223<br>649 | 0.656<br>045 | 0.9880<br>6  | 0.996<br>677 | 1          | 4673        |

Supplemental Table 6 – Results of VennPlex analysis overlapping gene expression ( $-1.5 \geq FC \geq 1.5$ ,  $p\text{-value} \leq 0.05$ ) in primary tumor (TG vs TR) with hypoxic induction in culture conditions (1% vs 20% O<sub>2</sub>).

| TG/TR                              |                                     | TG/TR $\cap$ 1%/20%               |                                       |                                    |
|------------------------------------|-------------------------------------|-----------------------------------|---------------------------------------|------------------------------------|
| <i>Up-regulated</i><br>Total = 164 | <i>Down-regulated</i><br>Total = 43 | <b>Up-regulated</b><br>Total = 41 | <i>Contra-regulated</i><br>Total = 12 | <b>Down-regulated</b><br>Total = 3 |

|              |                |               |                |             |
|--------------|----------------|---------------|----------------|-------------|
| ZEB2         | PRH1           | LRP1          | B3GALT5        | COMMD3-BMI1 |
| CCL5         | DGCR6          | NDRG1         | RTEL1-TNFRSF6B | FAM45B      |
| PARP14       | HOXC10         | TMEM45A       | DYX1C1         | CENPH       |
| GABPB1-AS1   | S100A5         | LRRC24        | SNED1          |             |
| BMI1         | GRM5-AS1       | ARPC4-TTLL3   | LOC100289019   |             |
| HSF4         | KRTAP2-3       | CA9           | LOC100630923   |             |
| TNXB         | APITD1-CORT    | HSD3BP4       | IL18BP         |             |
| IL1RAP       | RHEBL1         | RBM43         | SCG2           |             |
| C1R          | SPC24          | LOC646471     | KIAA1614       |             |
| LINC00649    | FANCB          | PTGFR         | PCDHGB3        |             |
| MUC1         | BATF3          | LINC00174     | SENP3-EIF4A1   |             |
| FAM126B      | LOC100507002   | USP32P2       | CHRNA10        |             |
| ITGA10       | CBR3           | PPFIA4        |                |             |
| SLFN5        | FBP1           | KDM7A         |                |             |
| CFB          | C16orf59       | LOC101928137  |                |             |
| SLC26A1      | C7orf55-LUC7L2 | ZNF439        |                |             |
| SMG7         | MYBL2          | OTUD6A        |                |             |
| PLSCR4       | MNS1           | EGLN3         |                |             |
| ZNF432       | MYZAP          | DNAH11        |                |             |
| ZNF550       | PTPRR          | PARGP1        |                |             |
| C6orf141     | UBE2T          | C9orf9        |                |             |
| HMBX1        | MND1           | LOX           |                |             |
| ZNF791       | HAS3           | RORA          |                |             |
| ZNF426       | CAMK4          | SMG1P1        |                |             |
| PPARA        | GINS1          | JAK3          |                |             |
| KCNQ1OT1     | BIRC5          | ZNF818P       |                |             |
| RNASE4       | TK1            | SLC9A4        |                |             |
| BMS1P4       | ATP6V0E2       | LINC00926     |                |             |
| IFI44L       | TIPIN          | SPERT         |                |             |
| NEAT1        | ASF1B          | LRRC3         |                |             |
| PCDHB14      | GCSH           | MUC15         |                |             |
| LOC101928936 | GINS2          | KCNQ3         |                |             |
| EXD1         | CDC45          | DNAJC9-AS1    |                |             |
| LOC100131257 | ABRACL         | PCDHGA7       |                |             |
| RPL32P3      | CDC20          | ANKRD20A5P    |                |             |
| TTC30A       | CDKN3          | FER1L4        |                |             |
| ZNF81        | NRGN           | RAPGEF4       |                |             |
| UCKL1-AS1    | PLK1           | LOC100272216  |                |             |
| LOC90834     | CDCA3          | PCDHGB6       |                |             |
| MALAT1       | ZWINT          | JMJD7-PLA2G4B |                |             |



|              |       |                        |  |  |
|--------------|-------|------------------------|--|--|
| ASTN2        | GTSE1 | <b>SPECC1L-ADORA2A</b> |  |  |
| LOC100288069 | AURKB |                        |  |  |
| FN1          | KIF24 |                        |  |  |
| PLA2R1       |       |                        |  |  |
| BMS1P5       |       |                        |  |  |
| BMS1P6       |       |                        |  |  |
| ZNF91        |       |                        |  |  |
| LOC646214    |       |                        |  |  |
| LOC101928600 |       |                        |  |  |
| FAM13A       |       |                        |  |  |
| EXPH5        |       |                        |  |  |
| FAM63B       |       |                        |  |  |
| ZNF708       |       |                        |  |  |
| CCDC68       |       |                        |  |  |
| LINC00506    |       |                        |  |  |
| CPEB4        |       |                        |  |  |
| LOC101926889 |       |                        |  |  |
| CAPRIN2      |       |                        |  |  |
| PTGS2        |       |                        |  |  |
| ANKRD36B     |       |                        |  |  |
| DNAH1        |       |                        |  |  |
| ZNF224       |       |                        |  |  |
| ZNF460       |       |                        |  |  |
| ZNF235       |       |                        |  |  |
| TSSK3        |       |                        |  |  |
| ZCWPW1       |       |                        |  |  |
| ZNF121       |       |                        |  |  |
| AMT          |       |                        |  |  |
| KBTBD12      |       |                        |  |  |
| GRTP1        |       |                        |  |  |
| MTUS1        |       |                        |  |  |
| DUXA         |       |                        |  |  |
| TRIM66       |       |                        |  |  |
| IDI2         |       |                        |  |  |
| MMP10        |       |                        |  |  |
| LOC401320    |       |                        |  |  |
| MAP1LC3C     |       |                        |  |  |
| ZNF204P      |       |                        |  |  |
| LRRC37A      |       |                        |  |  |
| LINC00319    |       |                        |  |  |
| GOLGA8B      |       |                        |  |  |

|                     |  |  |  |  |
|---------------------|--|--|--|--|
| SEC31B              |  |  |  |  |
| AHRR                |  |  |  |  |
| INHA                |  |  |  |  |
| NYAP2               |  |  |  |  |
| WNT2B               |  |  |  |  |
| CCDC144B            |  |  |  |  |
| PTGS1               |  |  |  |  |
| FAM227A             |  |  |  |  |
| SH3D21              |  |  |  |  |
| LOC100132062        |  |  |  |  |
| TMEM145             |  |  |  |  |
| SSC5D               |  |  |  |  |
| TNFSF10             |  |  |  |  |
| LOC100190986        |  |  |  |  |
| TTN                 |  |  |  |  |
| LOC100131564        |  |  |  |  |
| NLRP12              |  |  |  |  |
| C1S                 |  |  |  |  |
| LINC00458           |  |  |  |  |
| RPLP0P2             |  |  |  |  |
| DNAH7               |  |  |  |  |
| ZNF616              |  |  |  |  |
| CSAD                |  |  |  |  |
| USP32P1             |  |  |  |  |
| GUSBP3              |  |  |  |  |
| FAM71F2             |  |  |  |  |
| ZC3H12B             |  |  |  |  |
| ATP6V1G2-<br>DDX39B |  |  |  |  |
| ABCA1               |  |  |  |  |
| CNTN4               |  |  |  |  |
| LRRC56              |  |  |  |  |
| LOC100506551        |  |  |  |  |
| BACE1-AS            |  |  |  |  |
| KCND1               |  |  |  |  |
| LOC100996251        |  |  |  |  |
| TBX6                |  |  |  |  |
| MST1                |  |  |  |  |
| RASA4B              |  |  |  |  |
| COL11A2             |  |  |  |  |
| HS3ST3A1            |  |  |  |  |
| PKHD1               |  |  |  |  |

|              |  |  |  |  |
|--------------|--|--|--|--|
| GSDMB        |  |  |  |  |
| LINC01207    |  |  |  |  |
| ELOVL7       |  |  |  |  |
| HIST2H3D     |  |  |  |  |
| TMEM178A     |  |  |  |  |
| FRY          |  |  |  |  |
| MSS51        |  |  |  |  |
| LOC100130451 |  |  |  |  |
| MSH5-SAPCD1  |  |  |  |  |
| SKIDA1       |  |  |  |  |
| EBLN2        |  |  |  |  |
| SEMA4A       |  |  |  |  |
| GPC2         |  |  |  |  |
| TMEM236      |  |  |  |  |
| APOL4        |  |  |  |  |
| ANKRD20A12P  |  |  |  |  |
| LOC100289511 |  |  |  |  |
| LOC101929698 |  |  |  |  |
| BAGE2        |  |  |  |  |
| BAGE3        |  |  |  |  |
| LOC100505817 |  |  |  |  |
| AGBL2        |  |  |  |  |
| CAND2        |  |  |  |  |
| MIRLET7DHG   |  |  |  |  |
| CCDC183      |  |  |  |  |
| GADD45G      |  |  |  |  |
| LOC100996291 |  |  |  |  |
| SLC7A11-AS1  |  |  |  |  |
| CCDC144CP    |  |  |  |  |
| ADAM28       |  |  |  |  |
| BREA2        |  |  |  |  |
| CDKN2B-AS1   |  |  |  |  |
| PSORS1C2     |  |  |  |  |
| GCOM1        |  |  |  |  |
| LINC01209    |  |  |  |  |
| RBAK-RBAKDN  |  |  |  |  |
| CTAGE8       |  |  |  |  |
| CP           |  |  |  |  |
| CAMK2B       |  |  |  |  |
| STAC2        |  |  |  |  |
| C8orf44-SGK3 |  |  |  |  |

|      |  |  |  |  |
|------|--|--|--|--|
| NARR |  |  |  |  |
|------|--|--|--|--|

Supplementary Table 7 – Results of RNA sequencing analysis of lung samples, presented as the fold change (FC) of metastatic GFP+ (LG) cells over DsRed+ (LR) cells.  $-1.5 \geq FC \geq 1.5$  and  $p\text{-value} \leq 0.05$ .

| Gene_symbol  | NAME                                                                        | FC      | PValue |
|--------------|-----------------------------------------------------------------------------|---------|--------|
| LOC642423    | NA                                                                          | -15.815 | 0.001  |
| LDLRAD2      | low density lipoprotein receptor class A domain containing 2                | -11.331 | 0.001  |
| HNRNPA1P10   | heterogeneous nuclear ribonucleoprotein A1 pseudogene 10                    | -6.514  | 0.018  |
| PLA2G4B      | phospholipase A2, group IVB (cytosolic)                                     | -5.103  | 0.001  |
| LOC101928295 | NA                                                                          | -3.818  | 0.011  |
| NCRUPAR      | non-protein coding RNA, upstream of F2R/PAR1                                | -3.626  | 0.024  |
| FLT4         | fms-related tyrosine kinase 4                                               | -3.345  | 0.030  |
| SLC34A2      | solute carrier family 34 (type II sodium/phosphate cotransporter), member 2 | -3.336  | 0.016  |
| CGB          | chorionic gonadotropin, beta polypeptide                                    | -2.945  | 0.033  |
| FIRRE        | firre intergenic repeating RNA element                                      | -2.912  | 0.012  |
| ALPPL2       | alkaline phosphatase, placental-like 2                                      | -2.894  | 0.035  |
| GRM5-AS1     | GRM5 antisense RNA 1                                                        | -2.885  | 0.026  |
| ZNF852       | zinc finger protein 852                                                     | -2.883  | 0.015  |
| ANPEP        | alanyl (membrane) aminopeptidase                                            | -2.637  | 0.027  |
| FRMPD3       | FERM and PDZ domain containing 3                                            | -2.616  | 0.043  |
| SCN11A       | sodium channel, voltage gated, type XI alpha subunit                        | -2.589  | 0.036  |
| OLFML2B      | olfactomedin-like 2B                                                        | -2.568  | 0.018  |
| POM121L10P   | POM121 transmembrane nucleoporin-like 10, pseudogene                        | -2.526  | 0.030  |
| ZNF684       | zinc finger protein 684                                                     | -2.526  | 0.043  |
| GPC2         | glypican 2                                                                  | -2.512  | 0.048  |
| HOMEZ        | homeobox and leucine zipper encoding                                        | -2.495  | 0.048  |
| ZNF365       | zinc finger protein 365                                                     | -2.160  | 0.037  |
| PCDHGA3      | protocadherin gamma subfamily A, 3                                          | -2.115  | 0.007  |
| FAM86JP      | family with sequence similarity 86, member J, pseudogene                    | -2.097  | 0.016  |
| FGD3         | FYVE, RhoGEF and PH domain containing 3                                     | -2.080  | 0.009  |
| VIPR1        | vasoactive intestinal peptide receptor 1                                    | -2.040  | 0.029  |
| LRRN4CL      | LRRN4 C-terminal like                                                       | -1.975  | 0.026  |
| KCNJ12       | potassium channel, inwardly rectifying subfamily J, member 12               | -1.942  | 0.049  |
| RAB37        | RAB37, member RAS oncogene family                                           | -1.937  | 0.040  |
| PCDHGA12     | protocadherin gamma subfamily A, 12                                         | -1.914  | 0.036  |
| OXTR         | oxytocin receptor                                                           | -1.887  | 0.039  |
| PDGFRB       | platelet-derived growth factor receptor, beta polypeptide                   | -1.866  | 0.012  |
| RASL10A      | RAS-like, family 10, member A                                               | -1.866  | 0.046  |

|             |                                                                     |        |       |
|-------------|---------------------------------------------------------------------|--------|-------|
| APOBEC3G    | apolipoprotein B mRNA editing enzyme, catalytic polypeptide-like 3G | -1.856 | 0.037 |
| SSC5D       | scavenger receptor cysteine rich family, 5 domains                  | -1.815 | 0.014 |
| HCP5        | HLA complex P5 (non-protein coding)                                 | -1.770 | 0.011 |
| NCF2        | neutrophil cytosolic factor 2                                       | -1.763 | 0.007 |
| ARHGAP5-AS1 | ARHGAP5 antisense RNA 1 (head to head)                              | -1.716 | 0.027 |
| PAPLN       | papilin, proteoglycan-like sulfated glycoprotein                    | -1.692 | 0.045 |
| GDF15       | growth differentiation factor 15                                    | -1.665 | 0.010 |
| HAS3        | hyaluronan synthase 3                                               | -1.648 | 0.043 |
| PLCG2       | phospholipase C, gamma 2 (phosphatidylinositol-specific)            | -1.621 | 0.017 |
| MYRF        | myelin regulatory factor                                            | -1.569 | 0.041 |
| LAPTM5      | lysosomal protein transmembrane 5                                   | -1.544 | 0.017 |
| SHROOM2     | shroom family member 2                                              | -1.510 | 0.031 |
| ADAMTS15    | ADAM metalloproteinase with thrombospondin type 1 motif, 15         | -1.505 | 0.040 |
| TNFAIP8L1   | tumor necrosis factor, alpha-induced protein 8-like 1               | -1.504 | 0.032 |
| PKP2        | plakophilin 2                                                       | 1.506  | 0.029 |
| ALDOC       | aldolase C, fructose-bisphosphate                                   | 1.510  | 0.016 |
| TPD52       | tumor protein D52                                                   | 1.518  | 0.049 |
| KLF5        | Kruppel-like factor 5 (intestinal)                                  | 1.520  | 0.046 |
| RFK         | riboflavin kinase                                                   | 1.526  | 0.043 |
| HEATR5A     | HEAT repeat containing 5A                                           | 1.534  | 0.049 |
| F8          | coagulation factor VIII, procoagulant component                     | 1.542  | 0.046 |
| SOWAHC      | sosondawah ankyrin repeat domain family member C                    | 1.545  | 0.046 |
| PSMD5-AS1   | PSMD5 antisense RNA 1 (head to head)                                | 1.555  | 0.050 |
| DBNDD2      | dysbindin (dystrobrevin binding protein 1) domain containing 2      | 1.573  | 0.013 |
| SBF2-AS1    | SBF2 antisense RNA 1                                                | 1.574  | 0.043 |
| IGFBP1      | insulin-like growth factor binding protein 1                        | 1.580  | 0.028 |
| AKAP12      | A kinase (PRKA) anchor protein 12                                   | 1.583  | 0.033 |
| BNIP3L      | BCL2/adenovirus E1B 19kDa interacting protein 3-like                | 1.594  | 0.049 |
| L2HGDH      | L-2-hydroxyglutarate dehydrogenase                                  | 1.600  | 0.048 |
| ZMYM1       | zinc finger, MYM-type 1                                             | 1.603  | 0.048 |
| CXCR4       | chemokine (C-X-C motif) receptor 4                                  | 1.604  | 0.039 |
| GTF2H2      | general transcription factor IIH, polypeptide 2, 44kDa              | 1.609  | 0.041 |
| BNIP3       | BCL2/adenovirus E1B 19kDa interacting protein 3                     | 1.610  | 0.004 |
| ADM         | adrenomedullin                                                      | 1.615  | 0.007 |
| DTWD1       | DTW domain containing 1                                             | 1.618  | 0.045 |
| SLC36A4     | solute carrier family 36 (proton/amino acid symporter), member 4    | 1.626  | 0.027 |
| MXI1        | MAX interactor 1, dimerization protein                              | 1.628  | 0.016 |
| RNASE4      | ribonuclease, RNase A family, 4                                     | 1.635  | 0.038 |
| ZNF521      | zinc finger protein 521                                             | 1.636  | 0.025 |
| CRIP2       | cysteine-rich protein 2                                             | 1.641  | 0.014 |

|            |                                                                                          |       |       |
|------------|------------------------------------------------------------------------------------------|-------|-------|
| FAM13A     | family with sequence similarity 13, member A                                             | 1.650 | 0.022 |
| VLDLR      | very low density lipoprotein receptor                                                    | 1.651 | 0.032 |
| ZXDA       | zinc finger, X-linked, duplicated A                                                      | 1.652 | 0.034 |
| ZBTB21     | zinc finger and BTB domain containing 21                                                 | 1.657 | 0.035 |
| TMEM181    | transmembrane protein 181                                                                | 1.669 | 0.044 |
| ERO1L      | NA                                                                                       | 1.670 | 0.013 |
| KIAA0232   | KIAA0232                                                                                 | 1.673 | 0.043 |
| FAM45A     | family with sequence similarity 45, member A                                             | 1.691 | 0.025 |
| MIR210HG   | MIR210 host gene                                                                         | 1.700 | 0.012 |
| PDGFB      | platelet-derived growth factor beta polypeptide                                          | 1.702 | 0.004 |
| LRRC8B     | leucine rich repeat containing 8 family, member B                                        | 1.703 | 0.048 |
| C10orf10   | chromosome 10 open reading frame 10                                                      | 1.707 | 0.005 |
| ARSK       | arylsulfatase family, member K                                                           | 1.710 | 0.030 |
| TP53INP1   | tumor protein p53 inducible nuclear protein 1                                            | 1.712 | 0.048 |
| EML6       | echinoderm microtubule associated protein like 6                                         | 1.724 | 0.046 |
| ZNF766     | zinc finger protein 766                                                                  | 1.739 | 0.034 |
| MTX3       | metaxin 3                                                                                | 1.739 | 0.026 |
| SLC25A40   | solute carrier family 25, member 40                                                      | 1.751 | 0.045 |
| WHAMMP1    | WAS protein homolog associated with actin, golgi membranes and microtubules pseudogene 1 | 1.758 | 0.047 |
| LIMCH1     | LIM and calponin homology domains 1                                                      | 1.758 | 0.036 |
| SLC35A3    | solute carrier family 35 (UDP-N-acetylglucosamine (UDP-GlcNAc) transporter), member A3   | 1.759 | 0.034 |
| FKBP9P1    | FK506 binding protein 9 pseudogene 1                                                     | 1.769 | 0.032 |
| POLK       | polymerase (DNA directed) kappa                                                          | 1.771 | 0.043 |
| DNAH11     | dynein, axonemal, heavy chain 11                                                         | 1.789 | 0.033 |
| COX10-AS1  | COX10 antisense RNA 1                                                                    | 1.790 | 0.041 |
| PDE1C      | phosphodiesterase 1C, calmodulin-dependent 70kDa                                         | 1.790 | 0.046 |
| TPPP       | tubulin polymerization promoting protein                                                 | 1.794 | 0.018 |
| VGLL3      | vestigial-like family member 3                                                           | 1.795 | 0.019 |
| SOCS4      | suppressor of cytokine signaling 4                                                       | 1.799 | 0.022 |
| CCDC176    | coiled-coil domain containing 176                                                        | 1.804 | 0.019 |
| RIMKLA     | ribosomal modification protein rimK-like family member A                                 | 1.818 | 0.040 |
| GOLGA6L9   | golgin A6 family-like 9                                                                  | 1.823 | 0.030 |
| HS3ST3B1   | heparan sulfate (glucosamine) 3-O-sulfotransferase 3B1                                   | 1.840 | 0.017 |
| IGFBP3     | insulin-like growth factor binding protein 3                                             | 1.840 | 0.005 |
| NPIPB6     | nuclear pore complex interacting protein family, member B6                               | 1.846 | 0.025 |
| CSGALNACT1 | chondroitin sulfate N-acetylgalactosaminyltransferase 1                                  | 1.854 | 0.047 |
| IDI2       | isopentenyl-diphosphate delta isomerase 2                                                | 1.859 | 0.029 |
| BCL2A1     | BCL2-related protein A1                                                                  | 1.879 | 0.046 |
| TTN        | titin                                                                                    | 1.889 | 0.047 |
| NDRG1      | N-myc downstream regulated 1                                                             | 1.894 | 0.000 |

|              |                                                                                                           |       |       |
|--------------|-----------------------------------------------------------------------------------------------------------|-------|-------|
| SLIT2        | slit guidance ligand 2                                                                                    | 1.900 | 0.008 |
| PRPF39       | pre-mRNA processing factor 39                                                                             | 1.908 | 0.024 |
| PTGS2        | prostaglandin-endoperoxide synthase 2 (prostaglandin G/H synthase and cyclooxygenase)                     | 1.924 | 0.000 |
| ARTN         | artemin                                                                                                   | 1.926 | 0.028 |
| CPEB4        | cytoplasmic polyadenylation element binding protein 4                                                     | 1.927 | 0.005 |
| LOC101927797 | NA                                                                                                        | 1.939 | 0.020 |
| WNT2B        | wingless-type MMTV integration site family, member 2B                                                     | 1.959 | 0.048 |
| NAT1         | N-acetyltransferase 1 (arylamine N-acetyltransferase)                                                     | 1.971 | 0.039 |
| DOC2A        | double C2-like domains, alpha                                                                             | 2.001 | 0.040 |
| UTP14C       | UTP14, U3 small nucleolar ribonucleoprotein, homolog C (yeast)                                            | 2.006 | 0.015 |
| IL1A         | interleukin 1, alpha                                                                                      | 2.027 | 0.049 |
| TTL7         | tubulin tyrosine ligase-like family member 7                                                              | 2.042 | 0.042 |
| BMI1         | BMI1 proto-oncogene, polycomb ring finger                                                                 | 2.049 | 0.001 |
| NXPH4        | neurexophilin 4                                                                                           | 2.054 | 0.007 |
| PPFIA4       | protein tyrosine phosphatase, receptor type, f polypeptide (PTPRF), interacting protein (liprin), alpha 4 | 2.076 | 0.002 |
| EGLN3        | egl-9 family hypoxia-inducible factor 3                                                                   | 2.100 | 0.003 |
| SLC25A27     | solute carrier family 25, member 27                                                                       | 2.174 | 0.048 |
| PFN1P2       | profilin 1 pseudogene 2                                                                                   | 2.181 | 0.040 |
| LOX          | lysyl oxidase                                                                                             | 2.198 | 0.001 |
| FER1L4       | fer-1-like family member 4, pseudogene (functional)                                                       | 2.262 | 0.011 |
| CTNNA3       | catenin (cadherin-associated protein), alpha 3                                                            | 2.288 | 0.050 |
| C10orf85     | NA                                                                                                        | 2.323 | 0.020 |
| TREM1        | triggering receptor expressed on myeloid cells 1                                                          | 2.324 | 0.031 |
| RORA         | RAR-related orphan receptor A                                                                             | 2.325 | 0.018 |
| SMAD9        | SMAD family member 9                                                                                      | 2.343 | 0.044 |
| AADAC        | arylacetamide deacetylase                                                                                 | 2.393 | 0.043 |
| IPO9-AS1     | IPO9 antisense RNA 1                                                                                      | 2.457 | 0.042 |
| FHIT         | fragile histidine triad                                                                                   | 2.487 | 0.040 |
| CA9          | carbonic anhydrase IX                                                                                     | 2.489 | 0.000 |
| TMEM27       | transmembrane protein 27                                                                                  | 2.491 | 0.037 |
| ZNF474       | zinc finger protein 474                                                                                   | 2.492 | 0.011 |
| AMY2B        | amylase, alpha 2B (pancreatic)                                                                            | 2.528 | 0.031 |
| SH3BP5-AS1   | SH3BP5 antisense RNA 1                                                                                    | 2.592 | 0.011 |
| TICAM2       | toll-like receptor adaptor molecule 2                                                                     | 2.607 | 0.012 |
| ZNF415       | zinc finger protein 415                                                                                   | 2.640 | 0.021 |
| LOC100507577 | NA                                                                                                        | 2.657 | 0.020 |
| FAM95B1      | family with sequence similarity 95, member B1                                                             | 2.721 | 0.033 |
| LINC01024    | long intergenic non-protein coding RNA 1024                                                               | 2.808 | 0.009 |
| CP           | ceruloplasmin (ferroxidase)                                                                               | 2.922 | 0.000 |
| KLHDC1       | kelch domain containing 1                                                                                 | 3.019 | 0.008 |

|                |                                                                  |         |       |
|----------------|------------------------------------------------------------------|---------|-------|
| C2CD4A         | C2 calcium-dependent domain containing 4A                        | 3.056   | 0.022 |
| CCDC180        | coiled-coil domain containing 180                                | 3.198   | 0.007 |
| MPP7           | membrane protein, palmitoylated 7 (MAGUK p55 subfamily member 7) | 3.457   | 0.000 |
| FKBP1A-SDCBP2  | FKBP1A-SDCBP2 readthrough (NMD candidate)                        | 3.493   | 0.041 |
| JMJD7-PLA2G4B  | JMJD7-PLA2G4B readthrough                                        | 3.856   | 0.040 |
| EFCAB3         | EF-hand calcium binding domain 3                                 | 4.110   | 0.008 |
| NDUFA4L2       | NADH dehydrogenase (ubiquinone) 1 alpha subcomplex, 4-like 2     | 4.450   | 0.000 |
| LOC101928674   | NA                                                               | 4.528   | 0.008 |
| ARMCX5-GPRASP2 | ARMCX5-GPRASP2 readthrough                                       | 4.865   | 0.040 |
| SHC4           | SHC (Src homology 2 domain containing) family, member 4          | 5.287   | 0.003 |
| GAGE12F        | G antigen 12F                                                    | 5.492   | 0.006 |
| NEDD8-MDP1     | NEDD8-MDP1 readthrough                                           | 156.391 | 0.000 |
| C8orf44-SGK3   | C8orf44-SGK3 readthrough                                         | 165.829 | 0.000 |
| RAB4B-EGLN2    | RAB4B-EGLN2 readthrough (NMD candidate)                          | 287.408 | 0.000 |
| EIF3CL         | eukaryotic translation initiation factor 3, subunit C-like       | 821.897 | 0.000 |

Supplementary Table 8 – GSEA Enrichment Analysis investigating Hallmark Pathways in sorted lung samples GFP+ (LG) or DsRed+ (LR). Highlighted in green are the hallmarks with p-value $\leq$ 0.05 and FDR $\leq$ 0.25.

a) Enrichment in GFP+ lung metastatic cells (LG)

| NAME                             | SIZE | ES           | NES          | NOM p-val    | FDR q-val    | FWER p-val | RANK AT MAX |
|----------------------------------|------|--------------|--------------|--------------|--------------|------------|-------------|
| HALLMARK_HYPOXIA                 | 199  | 0.538<br>715 | 1.798<br>288 | 0            | 0.001<br>766 | 0.002      | 4613        |
| HALLMARK_PROTEIN_SECRETION       | 96   | 0.565<br>594 | 1.701<br>655 | 0            | 0.004<br>375 | 0.01       | 7452        |
| HALLMARK_TNFA_SIGNALING_VIA_NFKB | 199  | 0.410<br>184 | 1.362<br>003 | 0.0219<br>78 | 0.260<br>548 | 0.602      | 5456        |
| HALLMARK_GLYCOLYSIS              | 199  | 0.410<br>594 | 1.356<br>235 | 0.0189<br>7  | 0.210<br>373 | 0.626      | 4759        |
| HALLMARK_ANDROGEN_RESPONSE       | 101  | 0.439<br>238 | 1.351<br>719 | 0.0375<br>59 | 0.176<br>404 | 0.64       | 5046        |
| HALLMARK_IL2_STAT5_SIGNALING     | 199  | 0.396<br>644 | 1.319<br>925 | 0.0333<br>33 | 0.207<br>387 | 0.761      | 5016        |
| HALLMARK_INFLAMMATORY_RESPONSE   | 198  | 0.360<br>518 | 1.194<br>521 | 0.1101<br>81 | 0.534<br>351 | 0.993      | 4848        |
| HALLMARK_UV_RESPONSE_DN          | 144  | 0.361<br>415 | 1.156<br>637 | 0.1691<br>18 | 0.634<br>257 | 0.998      | 5333        |
| HALLMARK_APOPTOSIS               | 160  | 0.324<br>537 | 1.051<br>924 | 0.3357<br>35 | 1            | 1          | 5657        |



|                                            |     |              |              |              |              |   |      |
|--------------------------------------------|-----|--------------|--------------|--------------|--------------|---|------|
| HALLMARK_KRAS_SIGNALING_UP                 | 199 | 0.302<br>761 | 1.003<br>585 | 0.4624<br>11 | 1            | 1 | 3649 |
| HALLMARK_WNT_BETA_CATENIN_SIGNALING        | 42  | 0.358<br>629 | 0.963<br>757 | 0.5031<br>75 | 1            | 1 | 7342 |
| HALLMARK_MTORC1_SIGNALING                  | 199 | 0.284<br>04  | 0.935<br>021 | 0.6512<br>89 | 1            | 1 | 5232 |
| HALLMARK_COMPLEMENT                        | 196 | 0.282<br>537 | 0.933<br>023 | 0.6255<br>26 | 1            | 1 | 5366 |
| HALLMARK_COAGULATION                       | 136 | 0.294<br>355 | 0.929<br>393 | 0.6296<br>3  | 1            | 1 | 6010 |
| HALLMARK_ADIPOGENESIS                      | 196 | 0.275<br>471 | 0.905<br>878 | 0.7192<br>98 | 1            | 1 | 5890 |
| HALLMARK_MYOGENESIS                        | 200 | 0.270<br>522 | 0.896<br>173 | 0.7406<br>88 | 1            | 1 | 3419 |
| HALLMARK_REACTIVE_OXIGEN_SPECIES_PATHWAY   | 47  | 0.325<br>928 | 0.895<br>098 | 0.6609<br>64 | 1            | 1 | 2951 |
| HALLMARK_EPITHELIAL_MESENCHYMAL_TRANSITION | 198 | 0.263<br>402 | 0.878<br>643 | 0.7823<br>13 | 1            | 1 | 4815 |
| HALLMARK_UNFOLDED_PROTEIN_RESPONSE         | 112 | 0.283<br>732 | 0.872<br>582 | 0.7686<br>34 | 1            | 1 | 8297 |
| HALLMARK_FATTY_ACID_METABOLISM             | 158 | 0.269<br>902 | 0.870<br>105 | 0.7982<br>46 | 1            | 1 | 5124 |
| HALLMARK_ESTROGEN_RESPONSE_LATE            | 199 | 0.262<br>624 | 0.868<br>144 | 0.8236<br>95 | 1            | 1 | 3589 |
| HALLMARK_IL6_JAK_STAT3_SIGNALING           | 87  | 0.284<br>515 | 0.854<br>919 | 0.7678<br>3  | 1            | 1 | 3302 |
| HALLMARK_ESTROGEN_RESPONSE_EARLY           | 200 | 0.256<br>448 | 0.842<br>067 | 0.8792<br>14 | 1            | 1 | 5242 |
| HALLMARK_CHOLESTEROL_HOMEOSTASIS           | 73  | 0.287<br>363 | 0.833<br>387 | 0.8021<br>98 | 1            | 1 | 3215 |
| HALLMARK_PI3K_AKT_MTOR_SIGNALING           | 105 | 0.272<br>798 | 0.833<br>283 | 0.8169<br>64 | 1            | 1 | 7022 |
| HALLMARK_ALLOGRAFT_REJECTION               | 200 | 0.249<br>961 | 0.827<br>914 | 0.9149<br>23 | 0.999<br>125 | 1 | 4422 |
| HALLMARK_MITOTIC_SPINDLE                   | 198 | 0.251<br>85  | 0.827<br>646 | 0.9125<br>53 | 0.962<br>548 | 1 | 8348 |
| HALLMARK_HEME_METABOLISM                   | 195 | 0.246<br>006 | 0.824<br>177 | 0.9325<br>84 | 0.936<br>348 | 1 | 5867 |
| HALLMARK_UV_RESPONSE_UP                    | 156 | 0.237<br>605 | 0.769<br>222 | 0.9766<br>42 | 0.986<br>962 | 1 | 4903 |
| HALLMARK_TGF_BETA_SIGNALING                | 54  | 0.251<br>257 | 0.696<br>908 | 0.9601<br>91 | 0.989<br>623 | 1 | 5232 |

b) Enrichment in DsRed+ lung metastatic cells (LR)

| NAME                    | SIZE | ES               | NES              | NOM p-val   | FDR q-val    | FWER p-val | RANK AT MAX |
|-------------------------|------|------------------|------------------|-------------|--------------|------------|-------------|
| HALLMARK_E2F_TARGETS    | 199  | -<br>0.465<br>07 | -<br>1.671<br>54 | 0           | 0.019<br>11  | 0.014      | 5745        |
| HALLMARK_G2M_CHECKPOINT | 200  | -<br>0.357       | -<br>1.286<br>32 | 0.0148<br>7 | 0.497<br>579 | 0.56       | 5460        |

|                                    |     |                  |                  |              |              |       |      |
|------------------------------------|-----|------------------|------------------|--------------|--------------|-------|------|
| HALLMARK_PANCREAS_BETA_CELLS       | 40  | -<br>0.449<br>42 | -<br>1.261<br>27 | 0.1279<br>37 | 0.404<br>974 | 0.631 | 2571 |
| HALLMARK_MYC_TARGETS_V2            | 58  | -<br>0.410<br>31 | -<br>1.203<br>94 | 0.1363<br>64 | 0.474<br>78  | 0.788 | 7100 |
| HALLMARK_APICAL_SURFACE            | 44  | -<br>0.417<br>86 | -<br>1.203<br>34 | 0.1604<br>28 | 0.381<br>676 | 0.79  | 2687 |
| HALLMARK_OXIDATIVE_PHOSPHORYLATION | 199 | -<br>0.317<br>51 | -<br>1.151<br>75 | 0.1072<br>66 | 0.484<br>709 | 0.903 | 7217 |
| HALLMARK_KRAS_SIGNALING_DN         | 195 | -<br>0.296<br>74 | -<br>1.064<br>5  | 0.2811<br>39 | 0.800<br>57  | 0.995 | 4329 |
| HALLMARK_DNA_REPAIR                | 143 | -<br>0.300<br>47 | -<br>1.029<br>91 | 0.3501<br>68 | 0.890<br>122 | 0.999 | 6475 |
| HALLMARK_APICAL_JUNCTION           | 200 | -<br>0.285       | -<br>1.011<br>97 | 0.3799<br>28 | 0.891<br>073 | 1     | 5719 |
| HALLMARK_MYC_TARGETS_V1            | 199 | -<br>0.277<br>58 | -<br>1.011<br>3  | 0.3639<br>71 | 0.805<br>322 | 1     | 6269 |
| HALLMARK_SPERMATOGENESIS           | 133 | -<br>0.290<br>65 | -<br>0.991<br>4  | 0.4548<br>19 | 0.838<br>448 | 1     | 3012 |
| HALLMARK_INTERFERON_GAMMA_RESPONSE | 197 | -<br>0.269<br>95 | -<br>0.977<br>53 | 0.5378<br>79 | 0.833<br>004 | 1     | 4546 |
| HALLMARK_INTERFERON_ALPHA_RESPONSE | 94  | -<br>0.293<br>46 | -<br>0.956<br>18 | 0.5658<br>26 | 0.865<br>878 | 1     | 5355 |
| HALLMARK_XENOBIOTIC_METABOLISM     | 199 | -<br>0.250<br>69 | -<br>0.895<br>01 | 0.7959<br>18 | 1            | 1     | 4157 |
| HALLMARK_BILE_ACID_METABOLISM      | 112 | -<br>0.245<br>82 | -<br>0.836<br>61 | 0.9099<br>1  | 1            | 1     | 5807 |
| HALLMARK_HEDGEHOG_SIGNALING        | 36  | -<br>0.307<br>95 | -<br>0.835<br>89 | 0.7733<br>99 | 1            | 1     | 1672 |
| HALLMARK_PEROXISOME                | 103 | -<br>0.250<br>79 | -<br>0.829<br>12 | 0.8610<br>27 | 1            | 1     | 5389 |
| HALLMARK_P53_PATHWAY               | 199 | -<br>0.219<br>67 | -<br>0.791<br>09 | 1            | 1            | 1     | 4620 |
| HALLMARK_ANGIOGENESIS              | 36  | -<br>0.272<br>17 | -<br>0.748<br>2  | 0.9166<br>67 | 1            | 1     | 2839 |
| HALLMARK_NOTCH_SIGNALING           | 32  | -<br>0.231<br>83 | -<br>0.628<br>03 | 0.9877<br>15 | 0.998<br>483 | 1     | 5460 |

Supplemental Table 9 – Results of VennPlex analysis overlapping gene expression ( $-1.5 \geq FC \geq 1.5$ ,  $p\text{-value} \leq 0.05$ ) in primary tumor (TG vs TR) with lung metastasis induction in culture conditions (LG vs LR).

| LG/LR                              |                                     | TG/TR $\cap$ LG/LR                |                                      |                                    |
|------------------------------------|-------------------------------------|-----------------------------------|--------------------------------------|------------------------------------|
| <i>Up-regulated</i><br>Total = 102 | <i>Down-regulated</i><br>Total = 43 | <i>Up-regulated</i><br>Total = 19 | <i>Contra-regulated</i><br>Total = 2 | <i>Down-regulated</i><br>Total = 2 |
| PKP2                               | LOC642423                           | <b>BMI1</b>                       | SSC5D                                | <b>GRM5-AS1</b>                    |
| ALDOC                              | LDLRAD2                             | <b>NDRG1</b>                      | GPC2                                 | <b>HAS3</b>                        |
| TPD52                              | HNRNPA1P10                          | <b>RNASE4</b>                     |                                      |                                    |
| KLF5                               | PLA2G4B                             | <b>CA9</b>                        |                                      |                                    |
| RFK                                | LOC101928295                        | <b>FAM13A</b>                     |                                      |                                    |
| HEATR5A                            | NCRUPAR                             | <b>CPEB4</b>                      |                                      |                                    |
| F8                                 | FLT4                                | <b>PTGS2</b>                      |                                      |                                    |
| SOWAHC                             | SLC34A2                             | <b>PPFIA4</b>                     |                                      |                                    |
| PSMD5-AS1                          | CGB                                 | <b>IDI2</b>                       |                                      |                                    |
| DBNDD2                             | FIRRE                               | <b>EGLN3</b>                      |                                      |                                    |
| SBF2-AS1                           | ALPPL2                              | <b>DNAH11</b>                     |                                      |                                    |
| IGFBP1                             | ZNF852                              | <b>WNT2B</b>                      |                                      |                                    |
| AKAP12                             | ANPEP                               | <b>TTN</b>                        |                                      |                                    |
| BNIP3L                             | FRMPD3                              | <b>LOX</b>                        |                                      |                                    |
| L2HGDH                             | SCN11A                              | <b>RORA</b>                       |                                      |                                    |
| ZMYM1                              | OLFML2B                             | <b>FER1L4</b>                     |                                      |                                    |
| CXCR4                              | POM121L10P                          | <b>CP</b>                         |                                      |                                    |
| GTF2H2                             | ZNF684                              | <b>JMJD7-<br/>PLA2G4B</b>         |                                      |                                    |
| BNIP3                              | HOMEZ                               | <b>C8orf44-SGK3</b>               |                                      |                                    |
| ADM                                | ZNF365                              |                                   |                                      |                                    |
| DTWD1                              | PCDHGA3                             |                                   |                                      |                                    |
| SLC36A4                            | FAM86JP                             |                                   |                                      |                                    |
| MXI1                               | FGD3                                |                                   |                                      |                                    |
| ZNF521                             | VIPR1                               |                                   |                                      |                                    |
| CRIP2                              | LRRN4CL                             |                                   |                                      |                                    |
| VLDLR                              | KCNJ12                              |                                   |                                      |                                    |
| ZXDA                               | RAB37                               |                                   |                                      |                                    |
| ZBTB21                             | PCDHGA12                            |                                   |                                      |                                    |
| TMEM181                            | OXTR                                |                                   |                                      |                                    |
| ERO1L                              | PDGFRB                              |                                   |                                      |                                    |
| KIAA0232                           | RASL10A                             |                                   |                                      |                                    |
| FAM45A                             | APOBEC3G                            |                                   |                                      |                                    |
| MIR210HG                           | HCP5                                |                                   |                                      |                                    |
| PDGFB                              | NCF2                                |                                   |                                      |                                    |
| LRRC8B                             | ARHGAP5-AS1                         |                                   |                                      |                                    |

|              |           |  |  |  |
|--------------|-----------|--|--|--|
| C10orf10     | PAPLN     |  |  |  |
| ARSK         | GDF15     |  |  |  |
| TP53INP1     | PLCG2     |  |  |  |
| EML6         | MYRF      |  |  |  |
| ZNF766       | LAPTM5    |  |  |  |
| MTX3         | SHROOM2   |  |  |  |
| SLC25A40     | ADAMTS15  |  |  |  |
| WHAMMP1      | TNFAIP8L1 |  |  |  |
| LIMCH1       |           |  |  |  |
| SLC35A3      |           |  |  |  |
| FKBP9P1      |           |  |  |  |
| POLK         |           |  |  |  |
| COX10-AS1    |           |  |  |  |
| PDE1C        |           |  |  |  |
| TPPP         |           |  |  |  |
| VGLL3        |           |  |  |  |
| SOCS4        |           |  |  |  |
| CCDC176      |           |  |  |  |
| RIMKLA       |           |  |  |  |
| GOLGA6L9     |           |  |  |  |
| HS3ST3B1     |           |  |  |  |
| IGFBP3       |           |  |  |  |
| NPIP6        |           |  |  |  |
| CSGALNACT1   |           |  |  |  |
| BCL2A1       |           |  |  |  |
| SLIT2        |           |  |  |  |
| PRPF39       |           |  |  |  |
| ARTN         |           |  |  |  |
| LOC101927797 |           |  |  |  |
| NAT1         |           |  |  |  |
| DOC2A        |           |  |  |  |
| UTP14C       |           |  |  |  |
| IL1A         |           |  |  |  |
| TTLL7        |           |  |  |  |
| NXPH4        |           |  |  |  |
| SLC25A27     |           |  |  |  |
| PFN1P2       |           |  |  |  |
| CTNNA3       |           |  |  |  |
| C10orf85     |           |  |  |  |
| TREM1        |           |  |  |  |
| SMAD9        |           |  |  |  |

|                    |  |  |  |  |
|--------------------|--|--|--|--|
| AADAC              |  |  |  |  |
| IPO9-AS1           |  |  |  |  |
| FHIT               |  |  |  |  |
| TMEM27             |  |  |  |  |
| ZNF474             |  |  |  |  |
| AMY2B              |  |  |  |  |
| SH3BP5-AS1         |  |  |  |  |
| TICAM2             |  |  |  |  |
| ZNF415             |  |  |  |  |
| LOC100507577       |  |  |  |  |
| FAM95B1            |  |  |  |  |
| LINC01024          |  |  |  |  |
| KLHDC1             |  |  |  |  |
| C2CD4A             |  |  |  |  |
| CCDC180            |  |  |  |  |
| MPP7               |  |  |  |  |
| FKBP1A-SDCBP2      |  |  |  |  |
| EFCAB3             |  |  |  |  |
| NDUFA4L2           |  |  |  |  |
| LOC101928674       |  |  |  |  |
| ARMCX5-<br>GPRASP2 |  |  |  |  |
| SHC4               |  |  |  |  |
| GAGE12F            |  |  |  |  |
| NEDD8-MDP1         |  |  |  |  |
| RAB4B-EGLN2        |  |  |  |  |
| EIF3CL             |  |  |  |  |
